# Supplementary material for: Variable Effects of Twenty Sugars and Sugar Alcohols on the Retrogradation of Wheat Starch Gels
Source: MDPI journal article supplement (doi:10.3390/foods11193008), 2022-09-27
Supplement: s1 [file s1]

**Table S1.** Thermal properties of wheat starch slurries (gelatinization) and gels (retrogradation) made with 10 to 50% sucrose solutions. Enthalpies were not adjusted to dry starch content. Capital letters indicate significant differences.

|                    | <b>Gelatinization</b>        |        |       |           |        |       |                |        |       |
|--------------------|------------------------------|--------|-------|-----------|--------|-------|----------------|--------|-------|
|                    | Onset (°C)                   |        |       | Peak (°C) |        |       | Enthalpy (J/g) |        |       |
|                    | Avg.                         | SD     | Stat. | Avg.      | SD     | Stat. | Avg.           | SD     | Stat. |
| <b>Control</b>     | 60.60                        | ± 0.30 | F     | 64.70     | ± 0.15 | F     | 0.82           | ± 0.09 | B     |
| <b>10% Sucrose</b> | 63.40                        | ± 0.01 | E     | 67.52     | ± 0.01 | E     | 0.69           | ± 0.04 | B     |
| <b>20% Sucrose</b> | 66.66                        | ± 0.18 | D     | 71.02     | ± 0.16 | D     | 0.68           | ± 0.09 | B     |
| <b>30% Sucrose</b> | 71.42                        | ± 0.07 | C     | 75.74     | ± 0.10 | C     | 0.62           | ± 0.02 | B     |
| <b>40% Sucrose</b> | 76.66                        | ± 0.84 | B     | 81.73     | ± 0.11 | B     | 0.91           | ± 0.30 | AB    |
| <b>50% Sucrose</b> | 82.75                        | ± 1.35 | A     | 89.57     | ± 0.25 | A     | 1.26           | ± 0.22 | A     |
|                    | <b>Retrogradation Day 7</b>  |        |       |           |        |       |                |        |       |
|                    | Onset (°C)                   |        |       | Peak (°C) |        |       | Enthalpy (J/g) |        |       |
|                    | Avg.                         | SD     | Stat. | Avg.      | SD     | Stat. | Avg.           | SD     | Stat. |
| <b>Control</b>     | 48.85                        | ± 2.56 | A     | 55.07     | ± 0.75 | C     | 0.04           | ± 0.02 | D     |
| <b>10% Sucrose</b> | 49.49                        | ± 2.46 | A     | 55.59     | ± 0.37 | BC    | 0.03           | ± 0.00 | D     |
| <b>20% Sucrose</b> | 46.45                        | ± 2.18 | A     | 53.68     | ± 0.78 | C     | 0.11           | ± 0.03 | CD    |
| <b>30% Sucrose</b> | 46.15                        | ± 2.03 | A     | 55.69     | ± 2.01 | BC    | 0.14           | ± 0.02 | BC    |
| <b>40% Sucrose</b> | 47.58                        | ± 1.15 | A     | 58.49     | ± 1.03 | AB    | 0.23           | ± 0.07 | AB    |
| <b>50% Sucrose</b> | 47.92                        | ± 0.62 | A     | 60.32     | ± 1.18 | AB    | 0.27           | ± 0.02 | A     |
|                    | <b>Retrogradation Day 14</b> |        |       |           |        |       |                |        |       |
|                    | Onset (°C)                   |        |       | Peak (°C) |        |       | Enthalpy (J/g) |        |       |
|                    | Avg.                         | SD     | Stat. | Avg.      | SD     | Stat. | Avg.           | SD     | Stat. |
| <b>Control</b>     | 49.40                        | ± 4.00 | A     | 55.88     | ± 0.74 | BC    | 0.03           | ± 0.02 | E     |
| <b>10% Sucrose</b> | 44.07                        | ± 0.49 | AB    | 53.19     | ± 1.81 | C     | 0.06           | ± 0.01 | DE    |
| <b>20% Sucrose</b> | 42.88                        | ± 0.54 | B     | 52.65     | ± 1.13 | C     | 0.11           | ± 0.02 | CD    |
| <b>30% Sucrose</b> | 45.51                        | ± 0.95 | AB    | 56.51     | ± 1.00 | B     | 0.14           | ± 0.01 | BC    |
| <b>40% Sucrose</b> | 47.64                        | ± 3.01 | AB    | 58.70     | ± 0.77 | AB    | 0.19           | ± 0.03 | B     |
| <b>50% Sucrose</b> | 47.61                        | ± 0.60 | AB    | 60.96     | ± 0.38 | A     | 0.27           | ± 0.03 | A     |

**Table S2.** Anomeric and tautomeric forms of sweeteners in solution and the number of equatorial and exocyclic hydroxyl groups.

| Sweetener    | Mutarotation Distribution |         |          |         |       |           | # of Equatorial OH Groups<br>and Exocyclic OH Groups |         |          |         |      | Calculate<br>d equ.<br>and exo-<br>OH | Reporte<br>d e-OH | Referenc<br>e |
|--------------|---------------------------|---------|----------|---------|-------|-----------|------------------------------------------------------|---------|----------|---------|------|---------------------------------------|-------------------|---------------|
|              | Pyranose                  |         | Furanose |         | Open  | Reference | Pyranose                                             |         | Furanose |         | Open |                                       |                   |               |
|              | $\alpha$                  | $\beta$ | $\alpha$ | $\beta$ |       |           | $\alpha$                                             | $\beta$ | $\alpha$ | $\beta$ |      |                                       |                   |               |
| Ribose       | 21.5                      | 58.5    | 6.5      | 13.5    | 0.05  | [1]       | 2                                                    | 3       | 1        | 1       | 4    | 2.4                                   | 2.1               | [6]           |
| Xylose       | 36.5                      | 63      | 0.25     | 0.25    | 0.02  | [1]       | 3                                                    | 4       | 1        | 1       | 4    | 3.6                                   | 3.5               | [6]           |
| Xylitol      | NA                        | NA      | NA       | NA      | 100   |           | NA                                                   | NA      | NA       | NA      | 5    | 5.0                                   |                   |               |
| Glucose      | 38                        | 62      | 0.0      | 0.14    | 0.002 | [1]       | 4                                                    | 5       | 2        | 2       | 5    | 4.6                                   | 4.6               | [6]           |
| Galactose    | 30                        | 64      | 2.5      | 3.5     | 0.02  | [1]       | 3                                                    | 4       | 2        | 2       | 5    | 3.6                                   | 3.6               | [6]           |
| Mannose      | 65.5                      | 34.5    | 0.6      | 0.3     | 0.005 | [1]       | 3                                                    | 4       | 2        | 2       | 5    | 3.4                                   | 3.3               | [6]           |
| Fructose     | 2                         | 70      | 5        | 23      | 0.7   | [1]       | 2                                                    | 3       | 2        | 2       | 5    | 2.7                                   | 3.0               | [6]           |
| Tagatose     | 79                        | 16      | 1        | 4       | 0.6   | [1]       | 3                                                    | 4       | 2        | 2       | 5    | 3.1                                   |                   |               |
| L-Sorbose    | 98                        | 0       | 2        | 0       | 0.2   | [2]       | 4                                                    | 5       | 2        | 2       | 5    | 4.0                                   | 3.9               | [7]           |
| Sorbitol     | NA                        | NA      | NA       | NA      | 100   |           | NA                                                   | NA      | NA       | NA      | 6    | 6.0                                   |                   |               |
| Mannitol     | NA                        | NA      | NA       | NA      | 100   |           | NA                                                   | NA      | NA       | NA      | 6    | 6.0                                   |                   |               |
| Maltose      | 62                        | 38      | 0        | 0       | 0     | [3]       | 7                                                    | 8       | 6        | 6       | 10   | 7.4                                   | 7.2               | [6]           |
| Trehalose    | 100                       | 0       | 0        | 0       | 0     |           | 8                                                    | NA      | NA       | NA      | NA   | 8.0                                   | 8.0               | [8]           |
| Sucrose      | 0                         | 0       | 0        | 100     | 0     |           | NA                                                   | NA      | NA       | 6       | NA   | 6.0                                   | 6.3               | [6]           |
| Isomaltulose | 0                         | 0       | 25       | 69      | 6     | [4]       | 5                                                    | 6       | 5        | 5       | 9    | 5.2                                   |                   |               |
| Lactose      | 37.3                      | 62.7    | 0        | 0       | 0     | [5]       | 6                                                    | 7       | 5        | 5       | 9    | 6.6                                   | 6.7               | [9]           |
| Isomalt      | NA                        | NA      | NA       | NA      | 100   |           | NA                                                   | NA      | NA       | NA      | 9    | 9.0                                   |                   |               |
| Raffinose    | 0                         | 0       | 0        | 100     | 0     |           | NA                                                   | NA      | NA       | NA      | NA   | 8.0                                   | 8.3               | [6]           |

**Table S3.** Calculated sweetener solution  $N_{OH,eff}$  , and  $\phi_{w,eff}$  values.

| Sweetener    | Concentration | $N_{OH,eff}$ | $\phi_{w,eff}$ |
|--------------|---------------|--------------|----------------|
| Control      | 0             | 2.000        | 1.000          |
| Allulose     | 10            | 2.015        |                |
| Fructose     | 10            | 2.018        | 0.955          |
| Galactose    | 10            | 2.021        | 0.956          |
| Glucose      | 10            | 10.034       | 0.957          |
| Isomalt      | 10            | 10.016       |                |
| Isomaltulose | 10            | 10.017       | 0.946          |
| Lactose      | 10            | 10.184       | 0.955          |
| Maltitol     | 10            | 10.114       | 0.947          |
| Maltose      | 10            | 10.117       | 0.949          |
| Mannitol     | 10            | 10.182       | 0.950          |
| Mannose      | 10            | 10.214       | 0.957          |
| Raffinose    | 10            | 10.124       | 0.950          |
| Ribose       | 10            | 10.199       | 0.954          |
| Sorbitol     | 10            | 10.170       | 0.949          |
| Sorbose      | 10            | 10.193       | 0.955          |
| Sucrose      | 10            | 10.127       | 0.949          |
| Tagatose     | 10            | 10.188       | 0.956          |
| Trehalose    | 10            | 10.222       | 0.959          |
| Xylitol      | 10            | 10.185       | 0.949          |
| Xylose       | 10            | 10.223       | 0.956          |
| Allulose     | 20            | 9.250        |                |
| Fructose     | 20            | 9.279        | 0.906          |
| Galactose    | 20            | 9.318        | 0.908          |
| Glucose      | 20            | 9.335        | 0.910          |

|              |    |       |       |
|--------------|----|-------|-------|
| Isomalt      | 20 | 9.152 |       |
| Isomaltulose | 20 | 9.157 | 0.889 |
| Lactose      | 20 | 9.268 | 0.906 |
| Maltitol     | 20 | 9.130 | 0.889 |
| Maltose      | 20 | 9.136 | 0.893 |
| Mannose      | 20 | 9.329 | 0.910 |
| Raffinose    | 20 | 9.149 | 0.896 |
| Ribose       | 20 | 9.298 | 0.904 |
| Sorbitol     | 20 | 9.242 | 0.894 |
| Sorbose      | 20 | 9.287 | 0.907 |
| Sucrose      | 20 | 9.155 | 0.894 |
| Tagatose     | 20 | 9.276 | 0.907 |
| Trehalose    | 20 | 9.345 | 0.914 |
| Xylitol      | 20 | 9.270 | 0.894 |
| Xylose       | 20 | 9.348 | 0.909 |
| Allulose     | 30 | 8.325 |       |
| Fructose     | 30 | 8.369 | 0.853 |
| Galactose    | 30 | 8.428 | 0.857 |
| Glucose      | 30 | 8.453 | 0.859 |
| Isomalt      | 30 | 8.178 |       |
| Isomaltulose | 30 | 8.353 | 0.853 |
| Maltitol     | 30 | 8.146 | 0.827 |
| Maltose      | 30 | 8.154 | 0.832 |
| Mannose      | 30 | 8.443 | 0.859 |
| Raffinose    | 30 | 8.174 | 0.837 |
| Ribose       | 30 | 8.398 | 0.850 |
| Sorbitol     | 30 | 8.313 | 0.834 |

|              |    |       |       |
|--------------|----|-------|-------|
| Sorbose      | 30 | 8.381 | 0.854 |
| Sucrose      | 30 | 8.183 | 0.834 |
| Tagatose     | 30 | 8.365 | 0.855 |
| Trehalose    | 30 | 8.467 | 0.866 |
| Xylitol      | 30 | 8.356 | 0.835 |
| Xylose       | 30 | 8.473 | 0.858 |
| Allulose     | 40 | 7.400 |       |
| Fructose     | 40 | 7.459 | 0.795 |
| Glucose      | 40 | 7.572 | 0.803 |
| Isomalt      | 40 | 7.205 |       |
| Isomaltulose | 40 | 7.215 | 0.856 |
| Maltitol     | 40 | 7.161 | 0.759 |
| Maltose      | 40 | 7.173 | 0.766 |
| Mannose      | 40 | 7.558 | 0.803 |
| Ribose       | 40 | 7.498 | 0.791 |
| Sorbitol     | 40 | 7.385 | 0.771 |
| Sorbose      | 40 | 7.475 | 0.796 |
| Sucrose      | 40 | 7.211 | 0.768 |
| Tagatose     | 40 | 7.454 | 0.798 |
| Trehalose    | 40 | 7.590 | 0.812 |
| Xylitol      | 40 | 7.442 | 0.771 |
| Xylose       | 40 | 7.597 | 0.803 |
| Allulose     | 50 | 6.476 |       |
| Fructose     | 50 | 6.549 | 0.732 |
| Glucose      | 50 | 6.690 | 0.743 |
| Maltitol     | 50 | 6.177 | 0.685 |
| Maltose      | 50 | 6.192 | 0.693 |

|          |    |       |       |
|----------|----|-------|-------|
| Mannose  | 50 | 6.673 | 0.742 |
| Ribose   | 50 | 6.598 | 0.727 |
| Sorbitol | 50 | 6.456 | 0.701 |
| Sucrose  | 50 | 6.238 | 0.696 |
| Tagatose | 50 | 6.543 | 0.735 |
| Xylitol  | 50 | 6.528 | 0.703 |
| Xylose   | 50 | 6.722 | 0.742 |

---

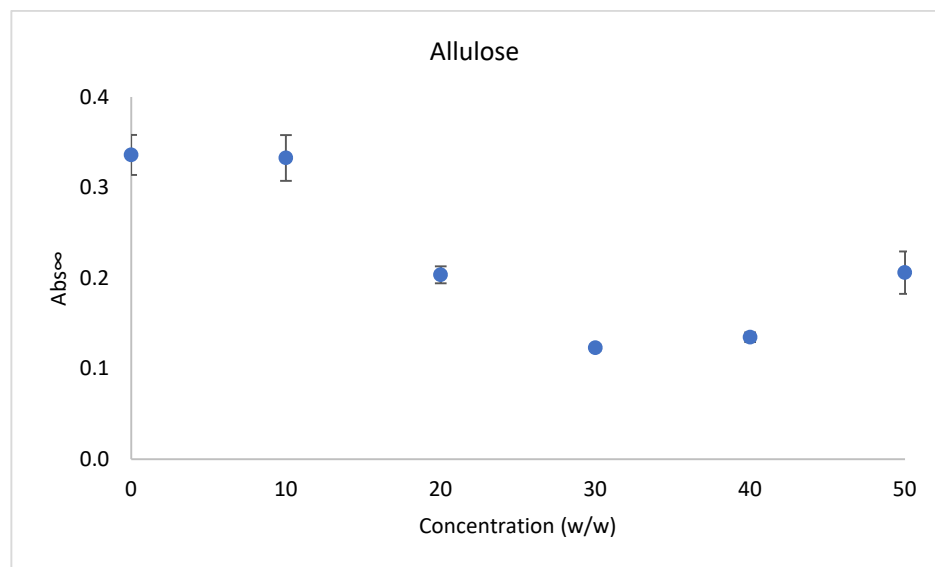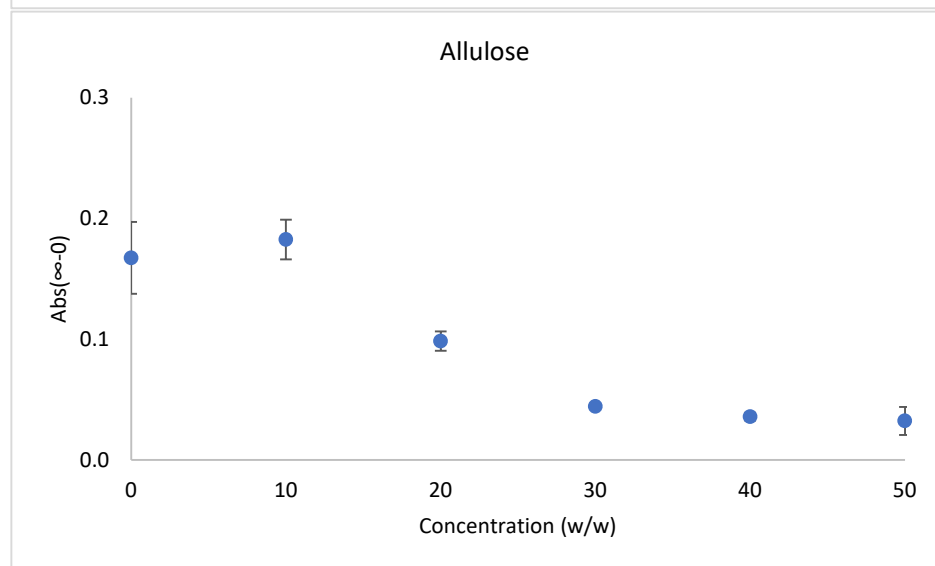

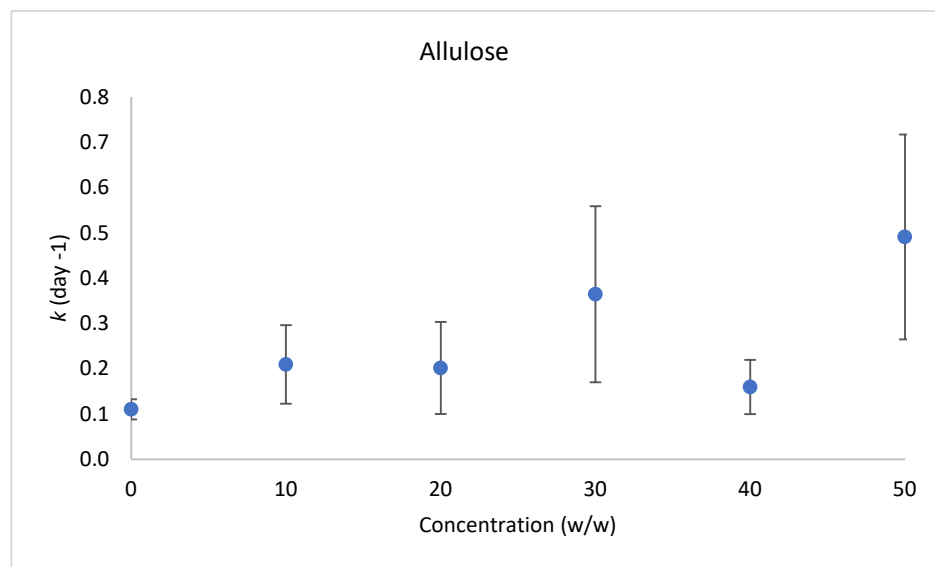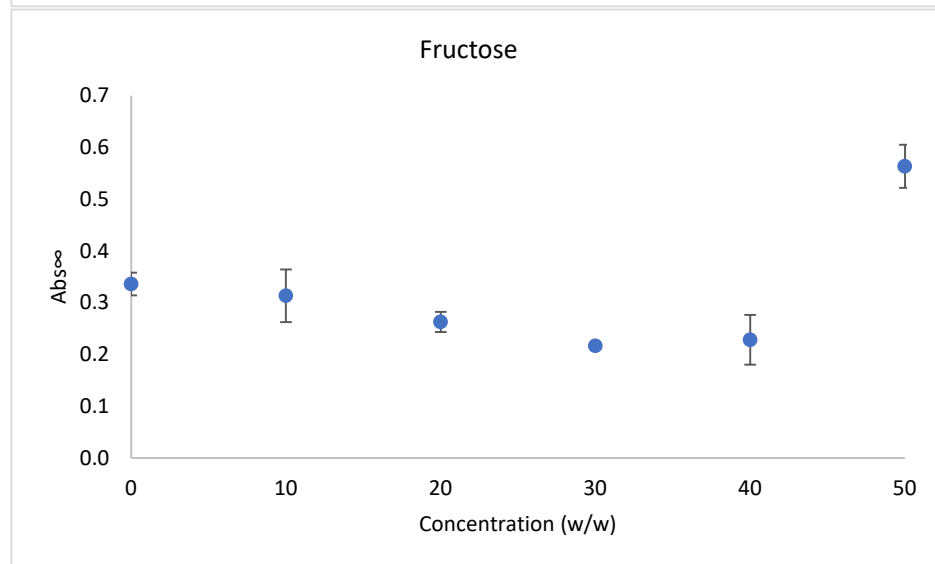



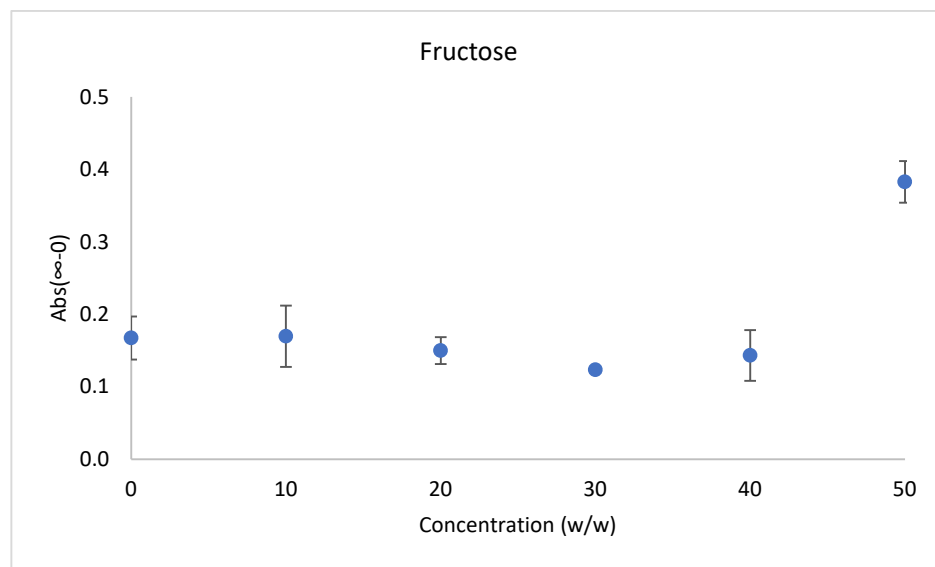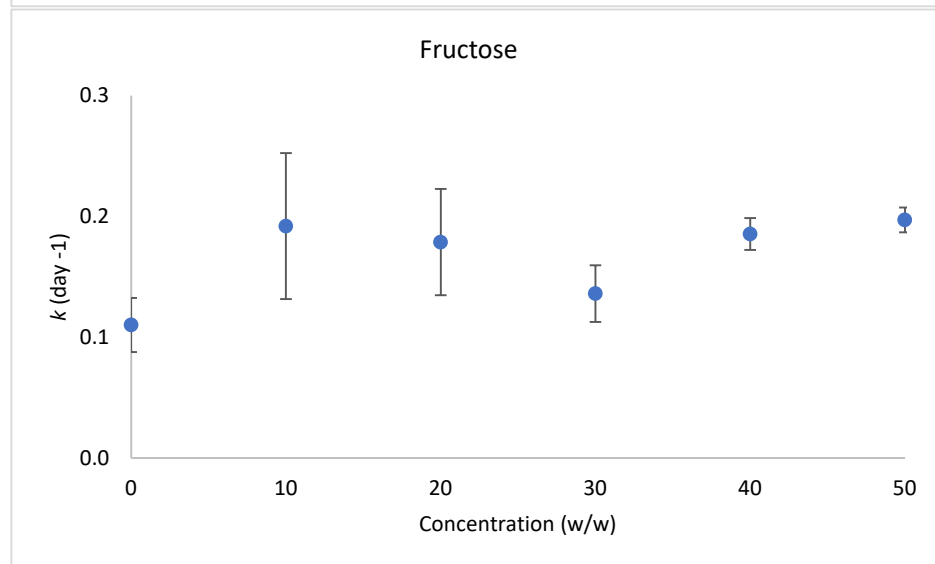

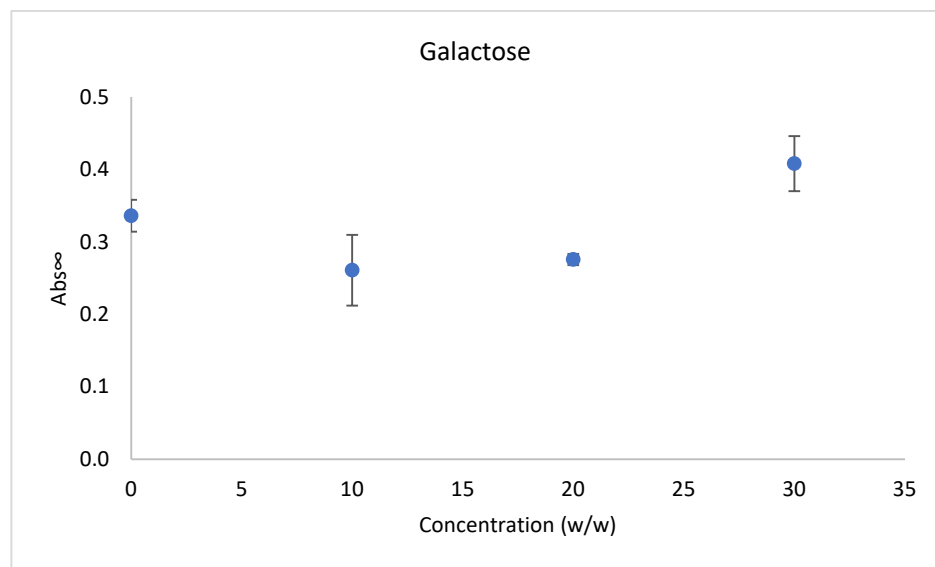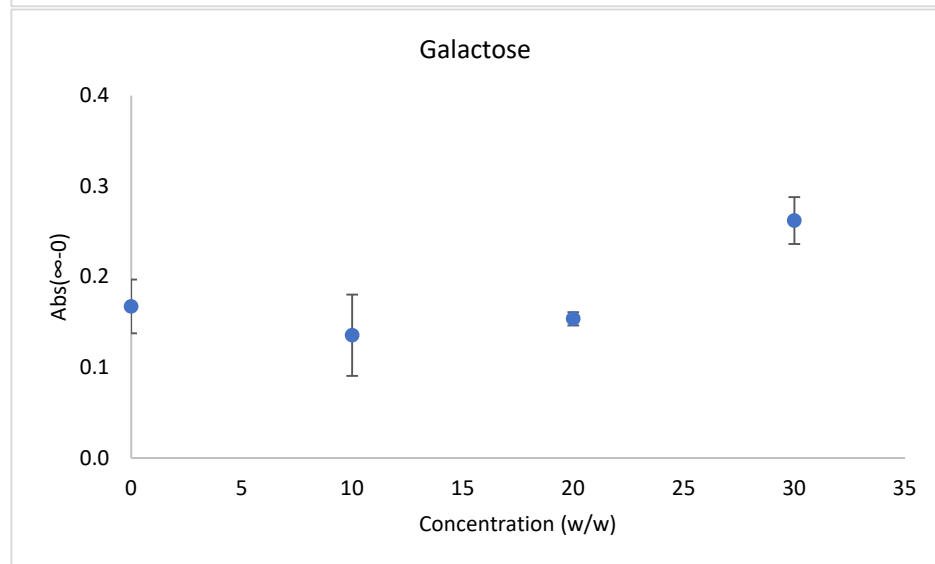

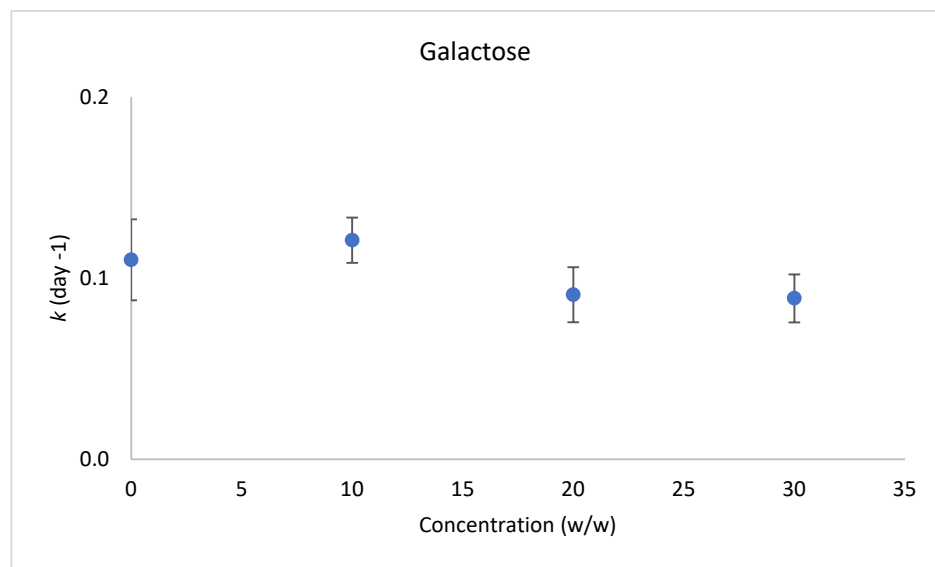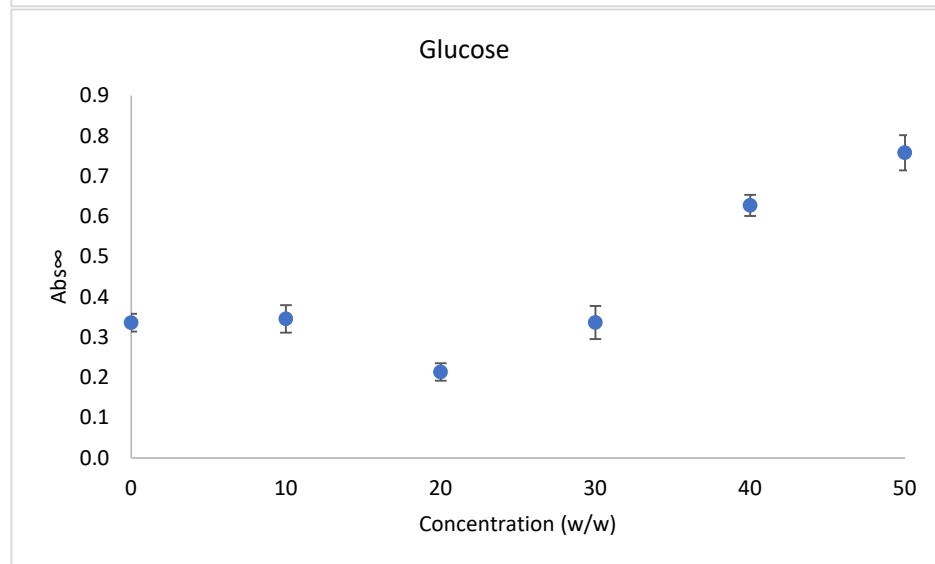

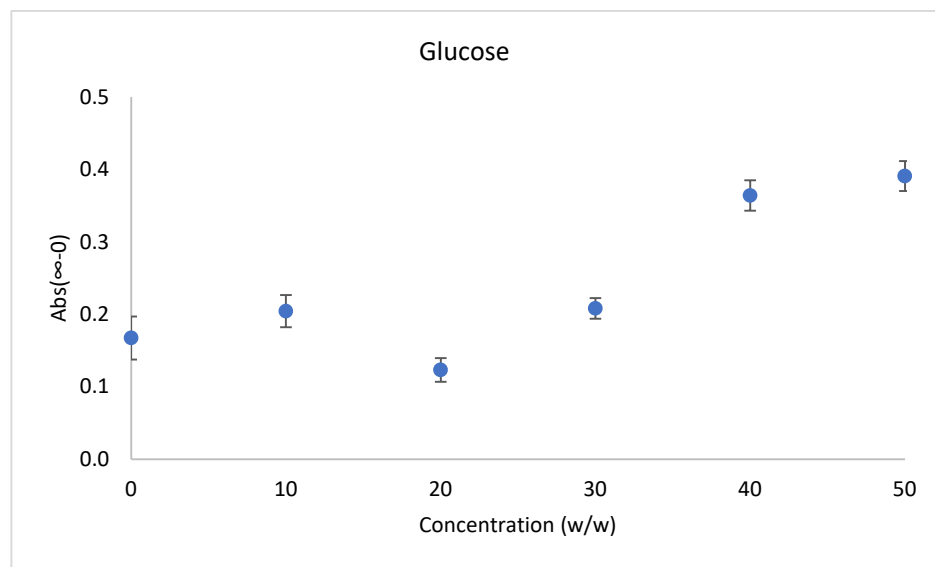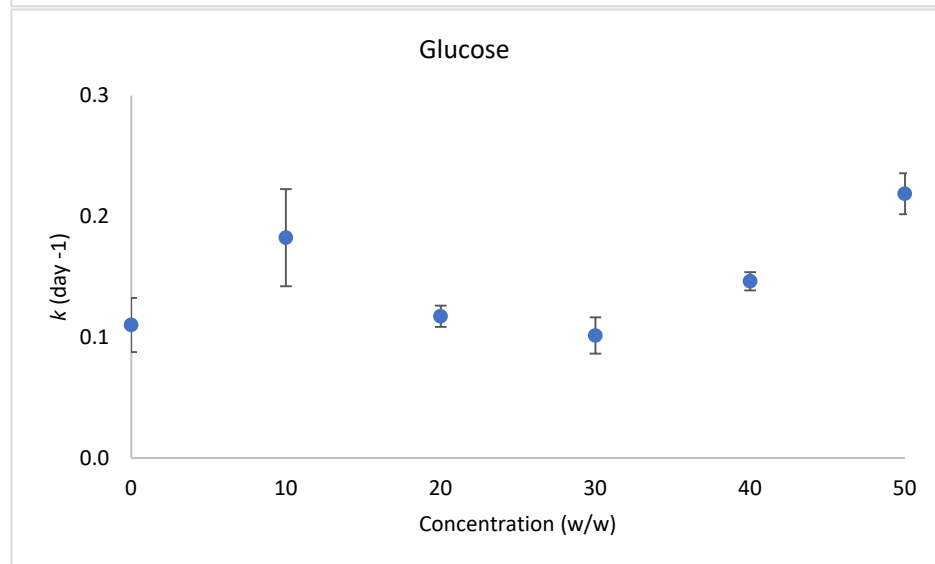

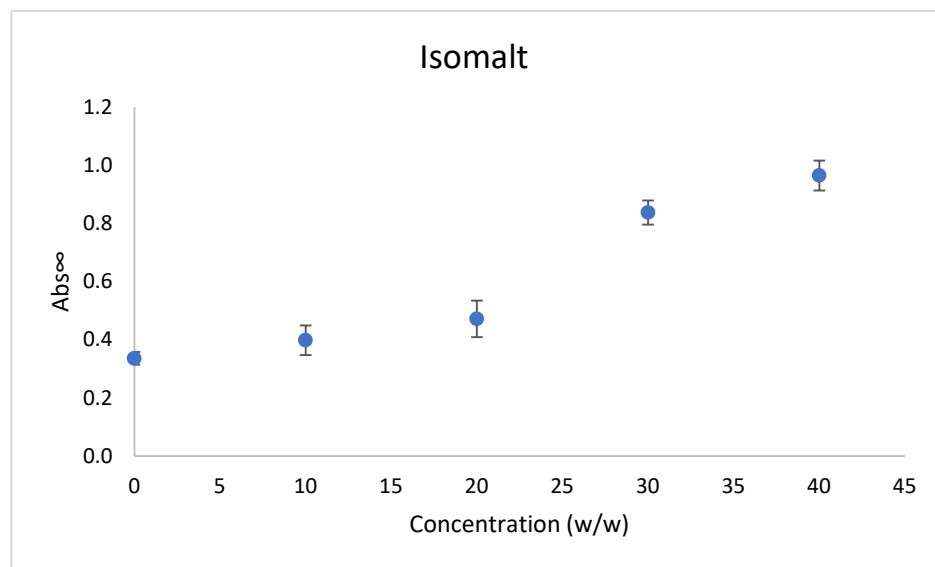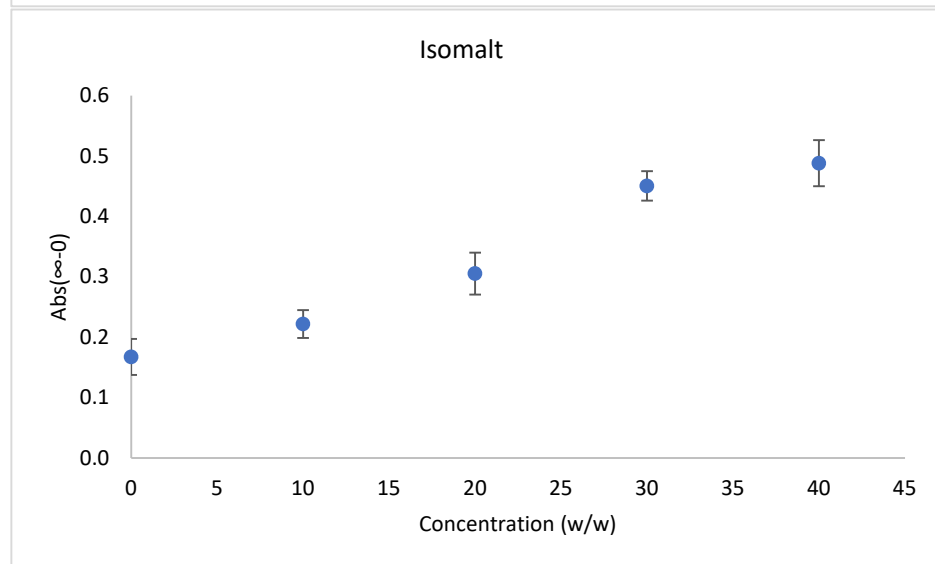

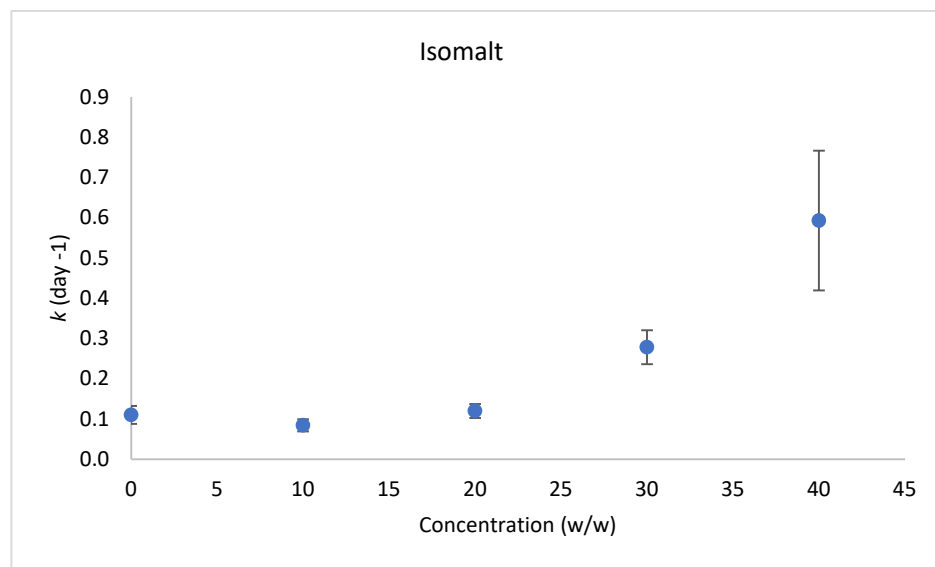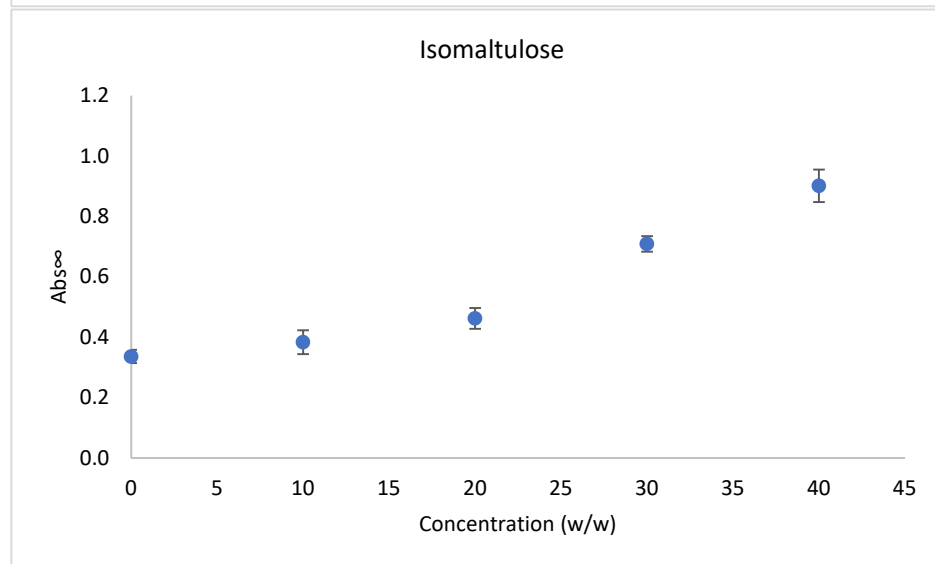

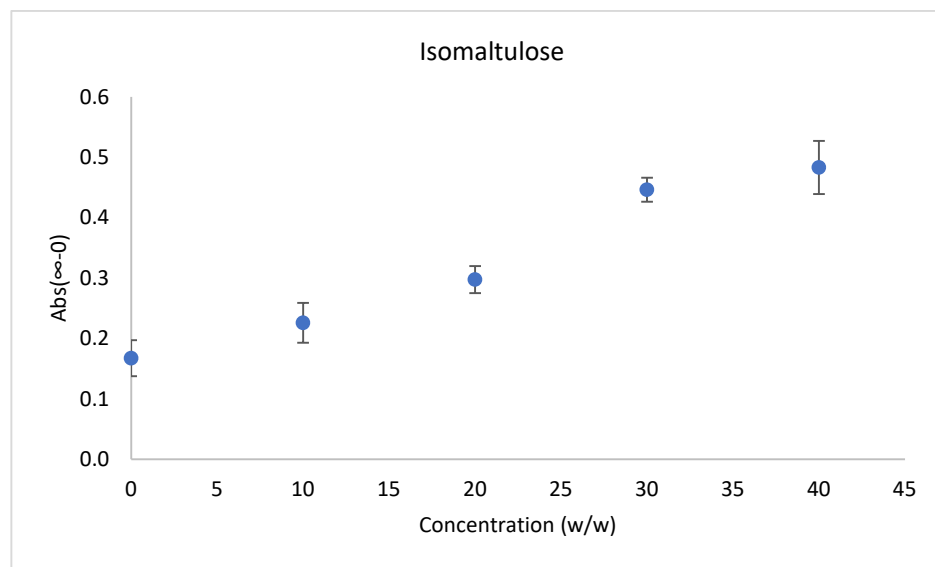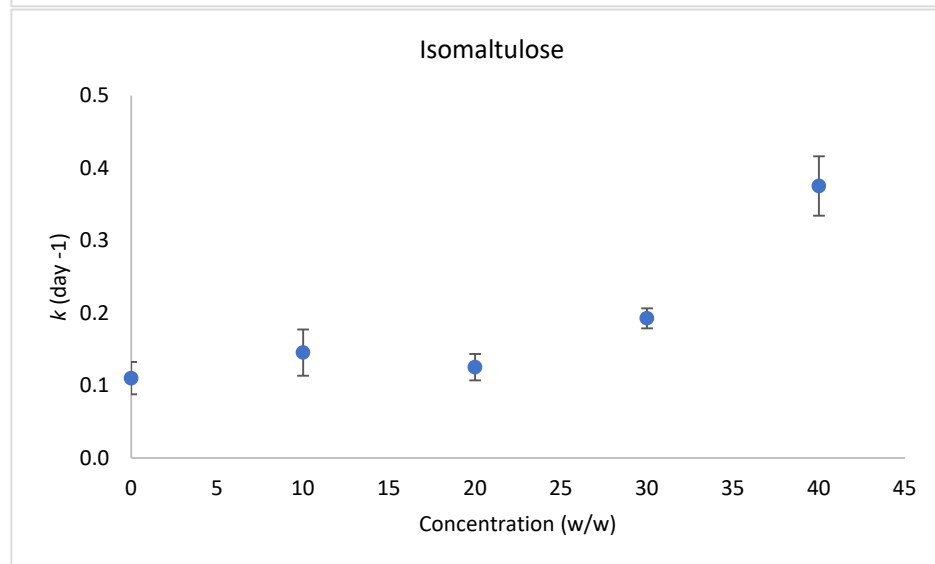

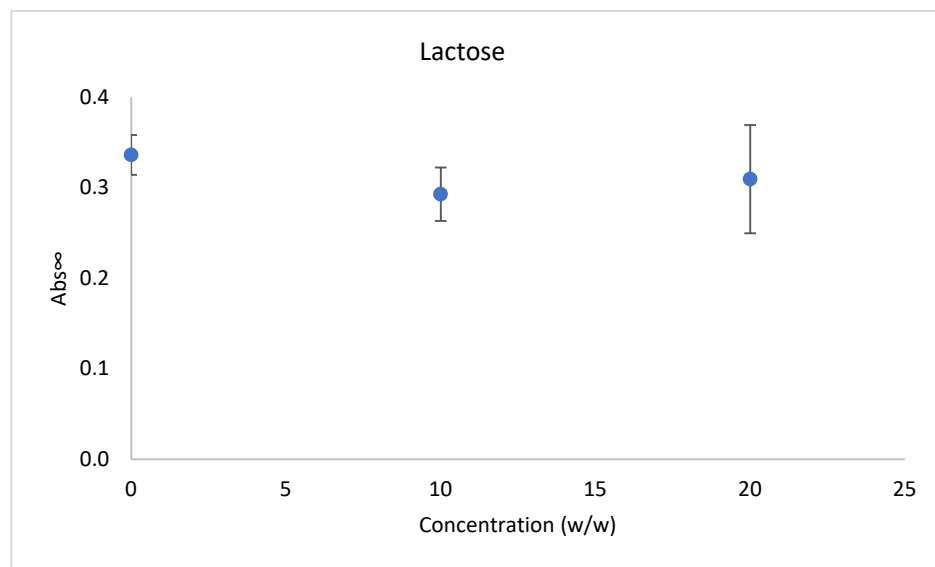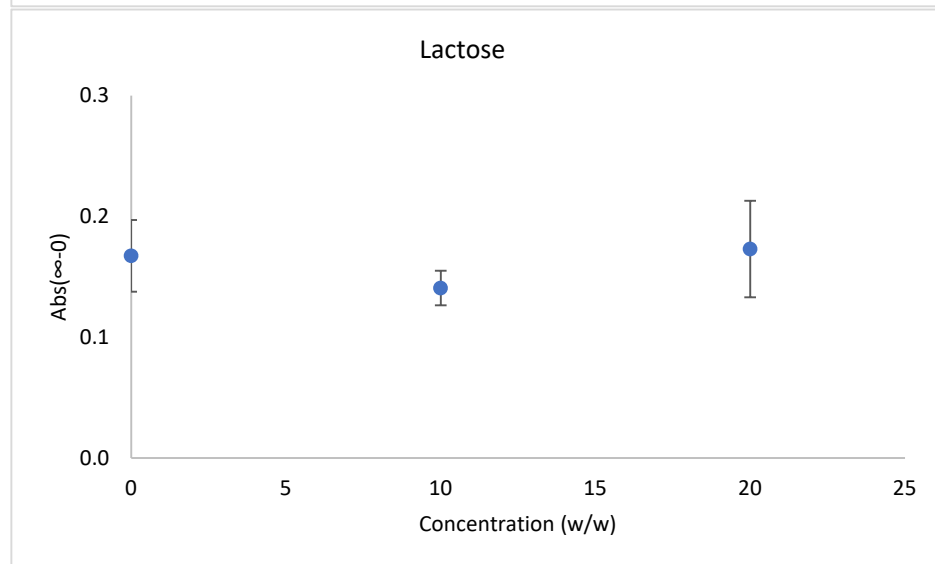



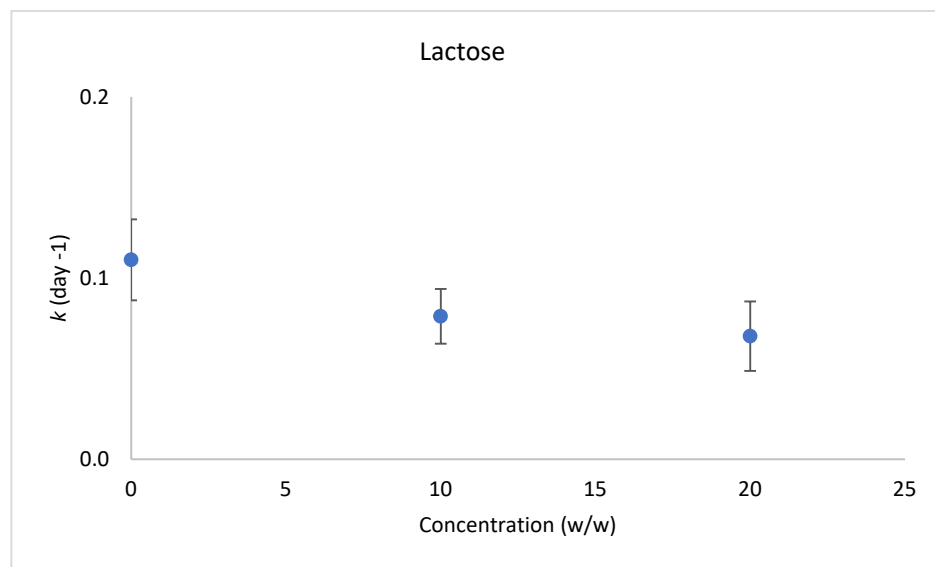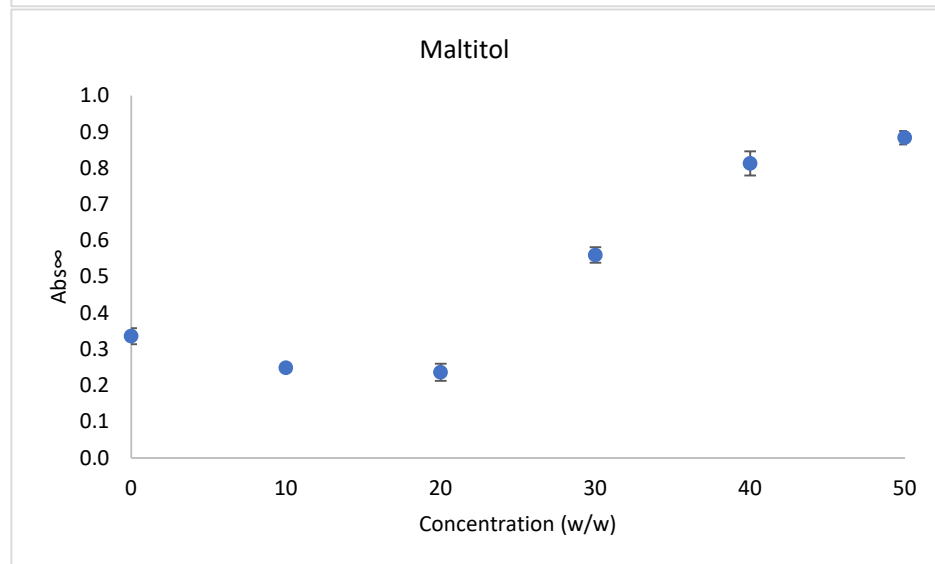

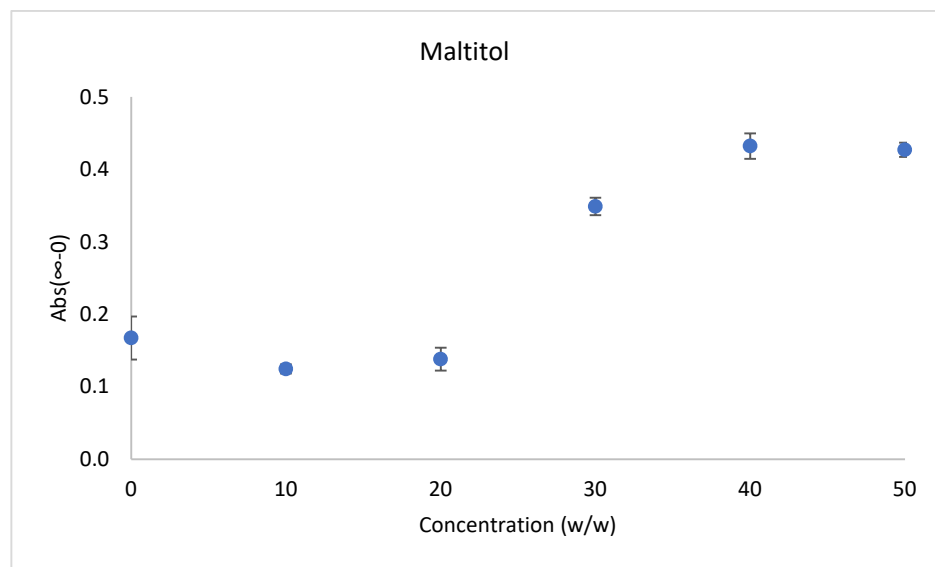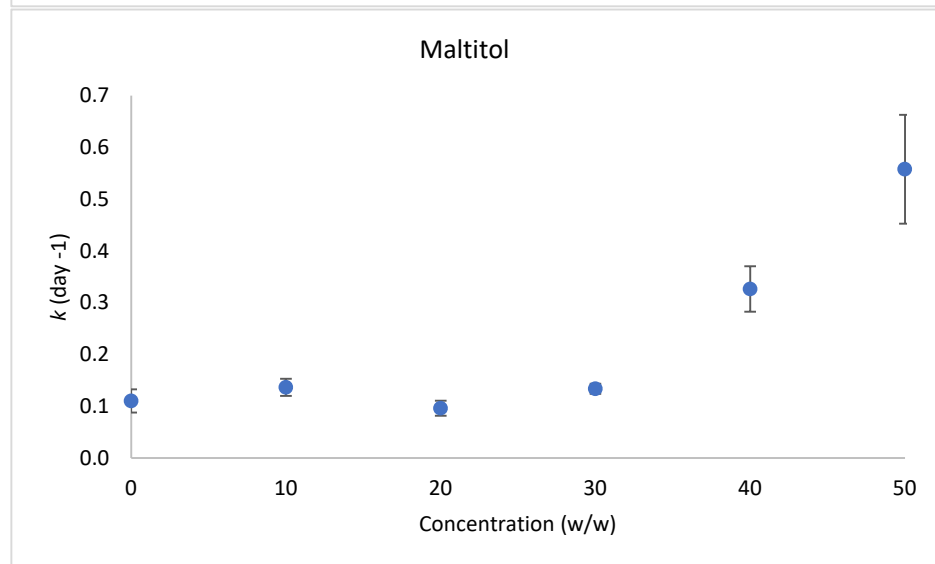

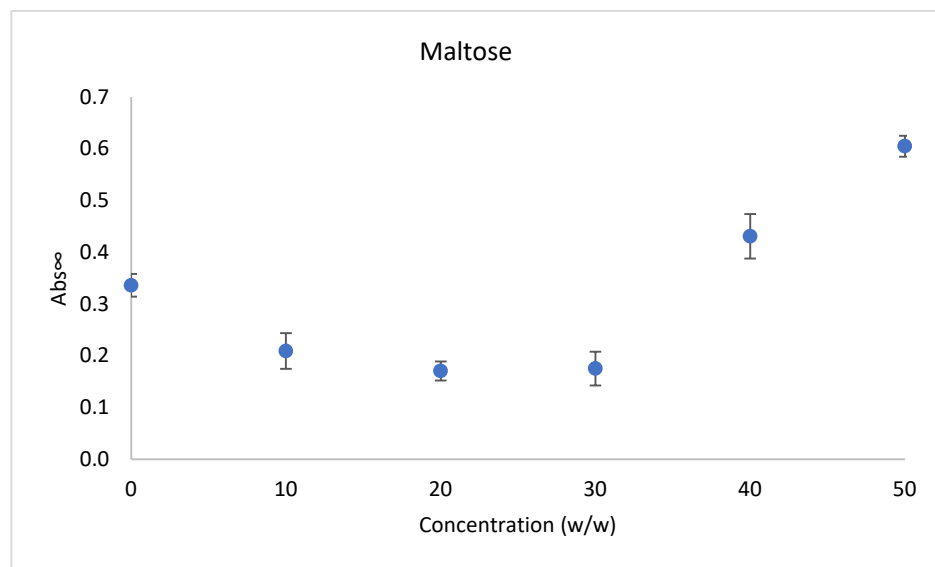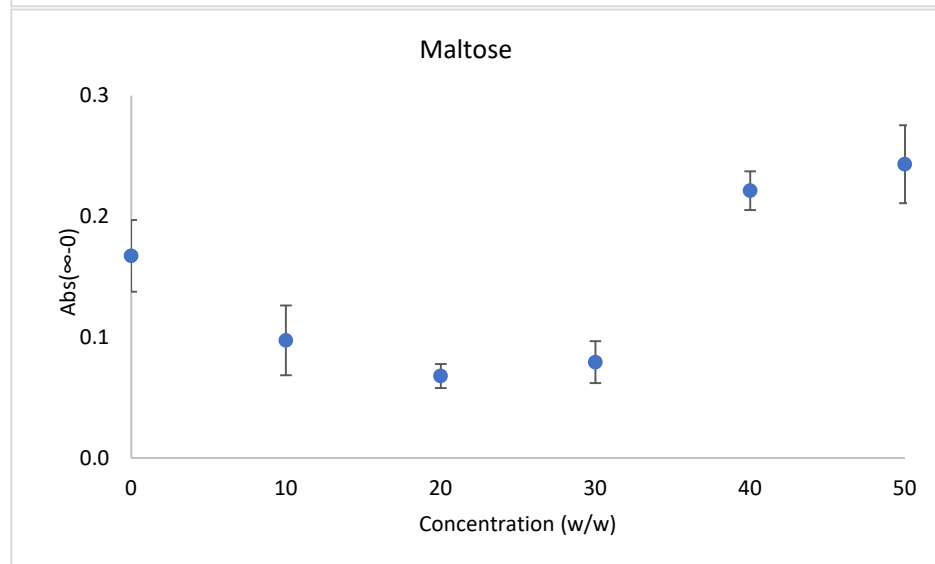

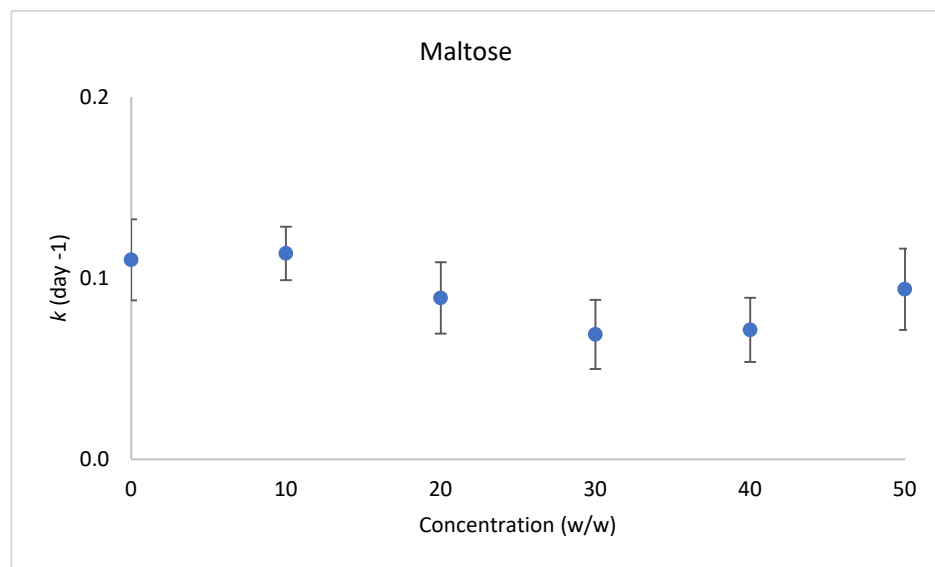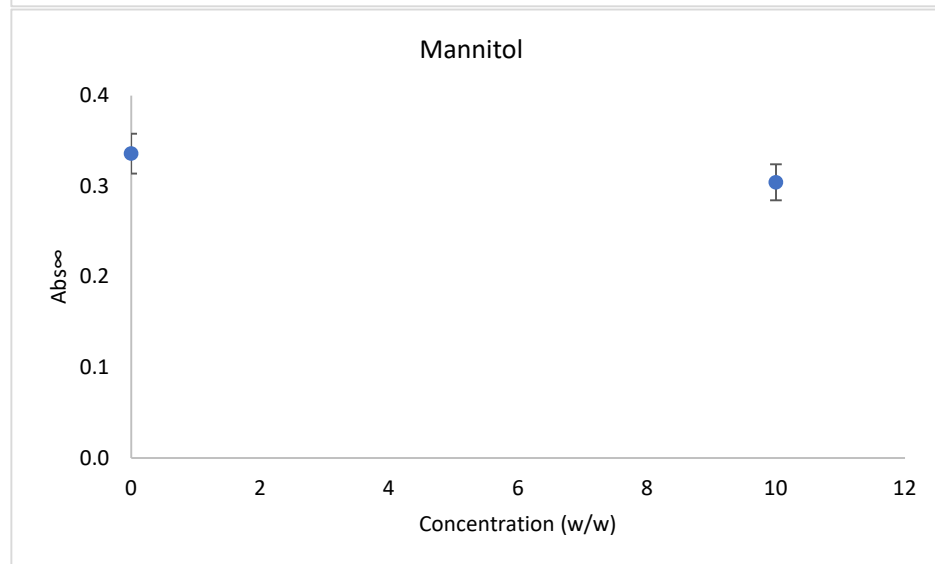

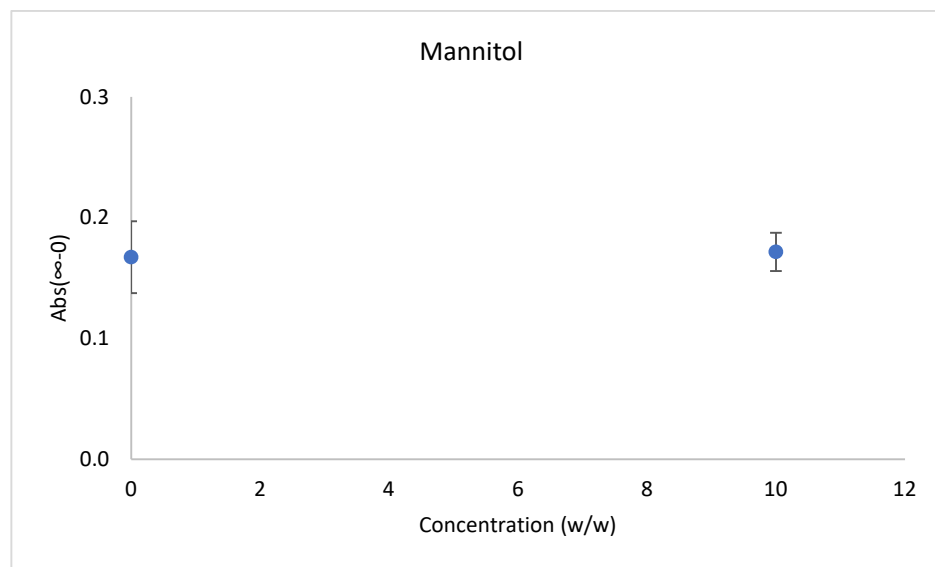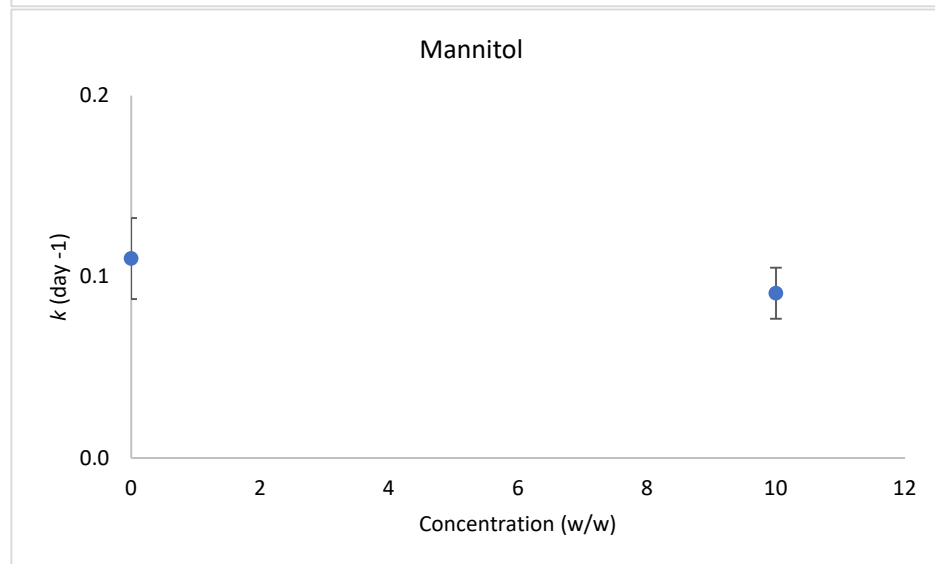

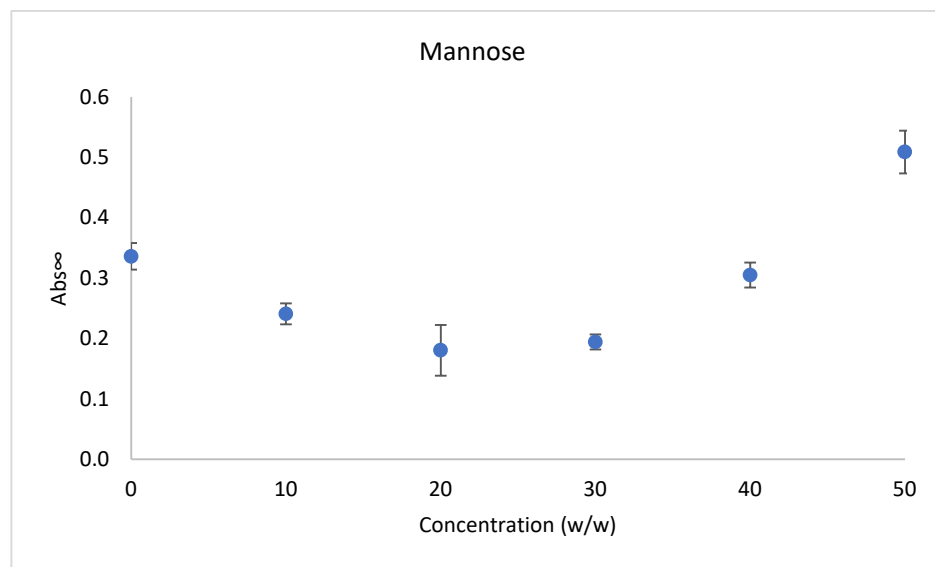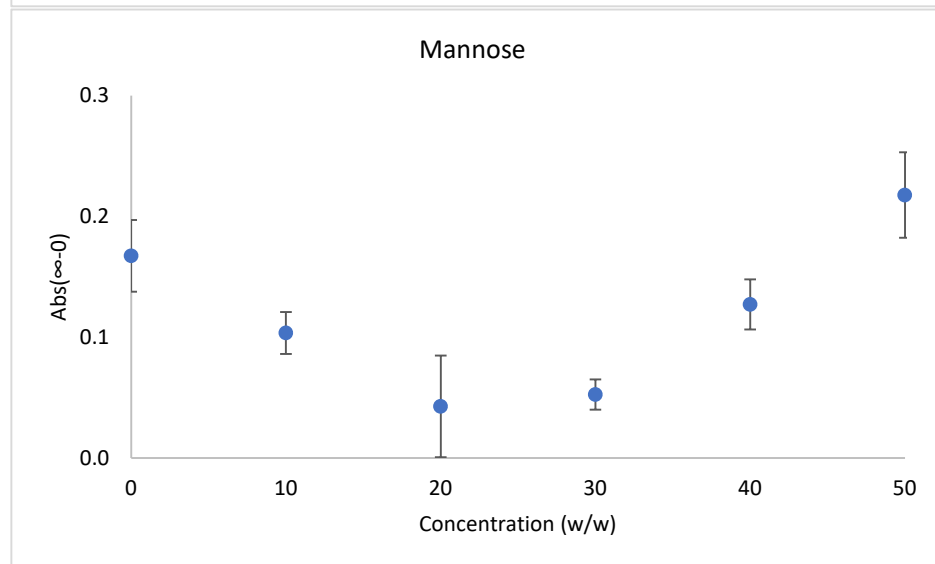

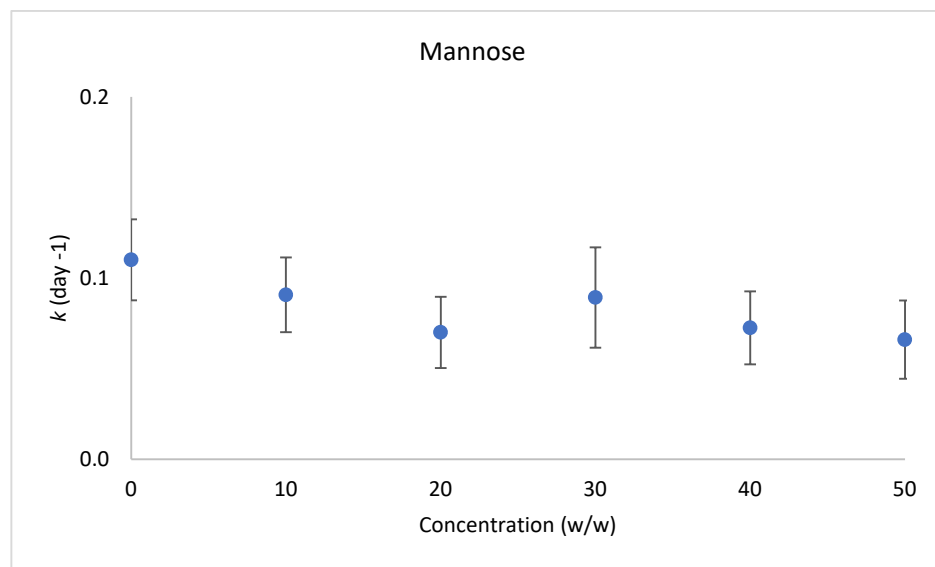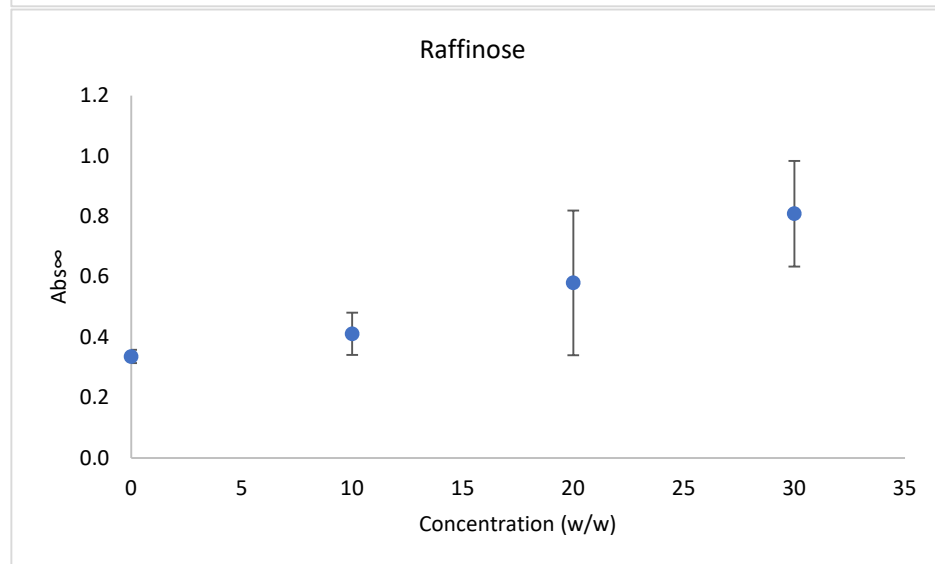

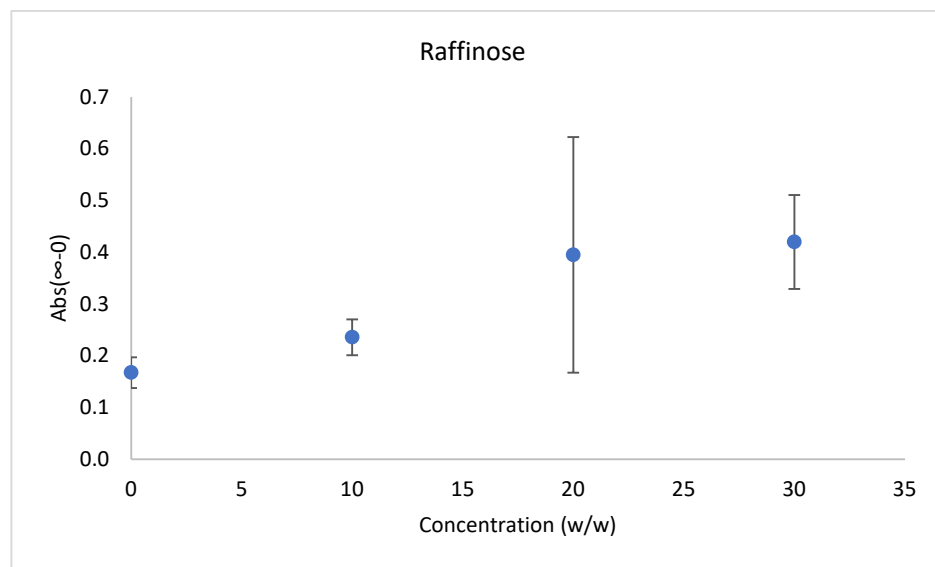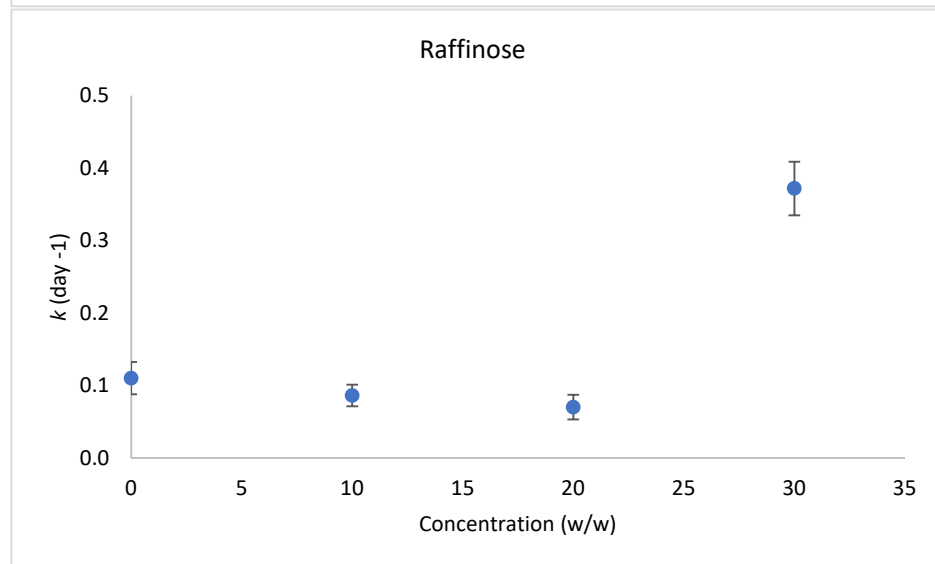



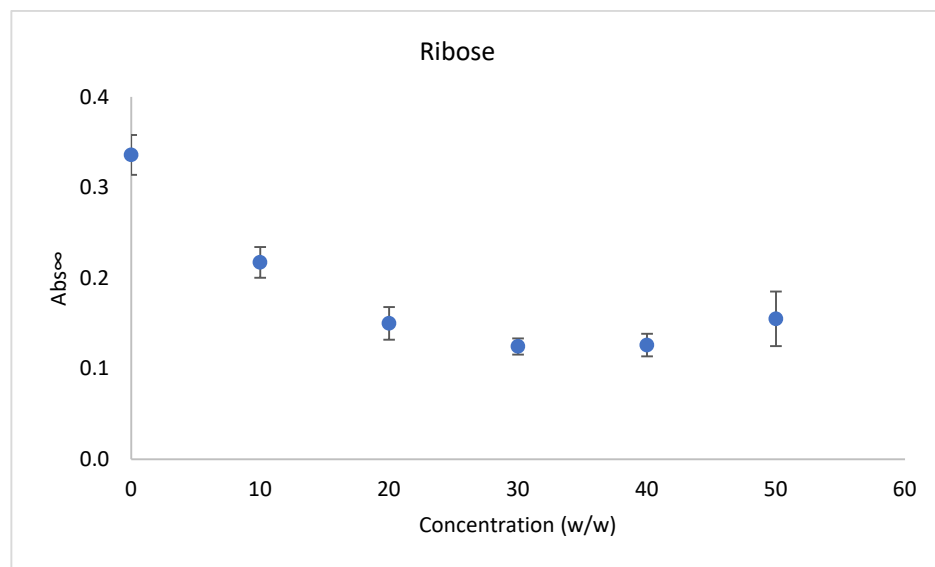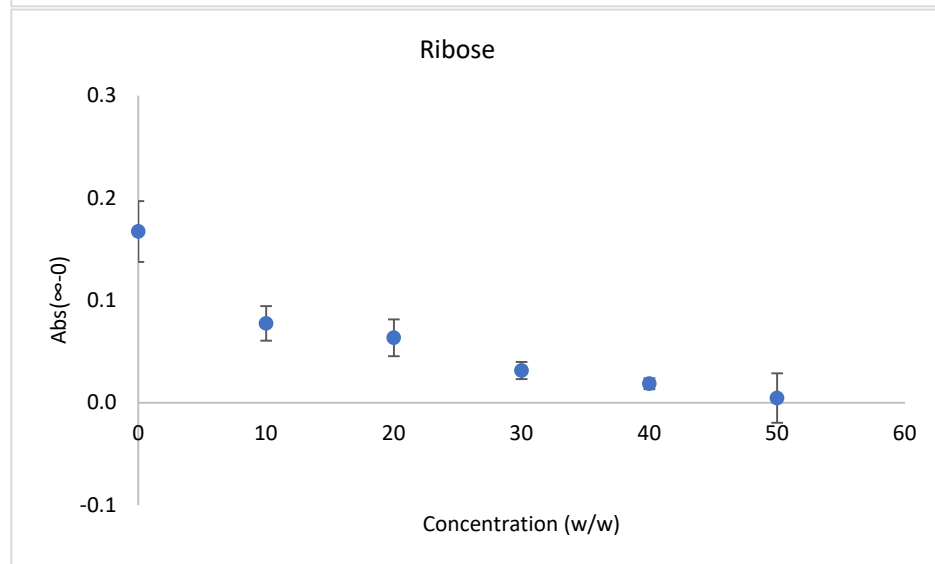

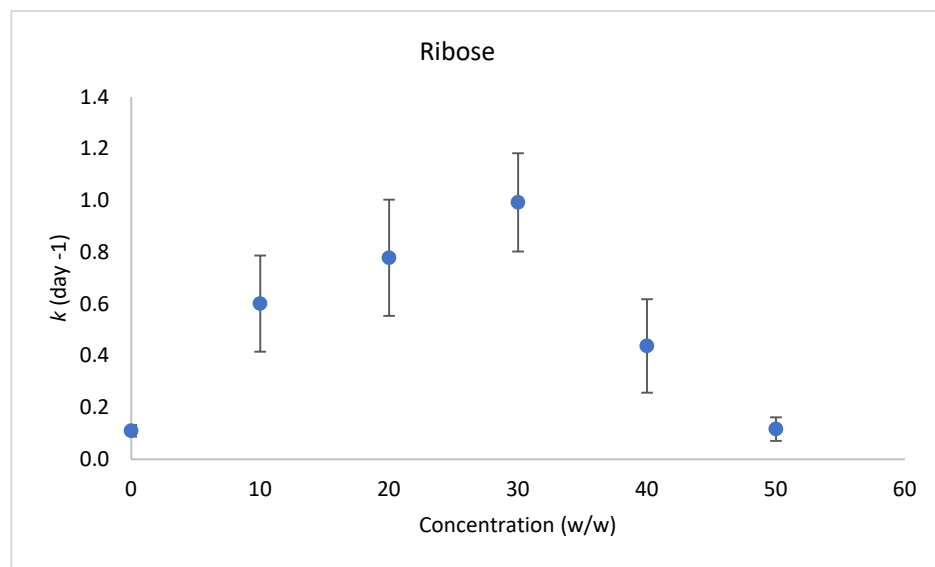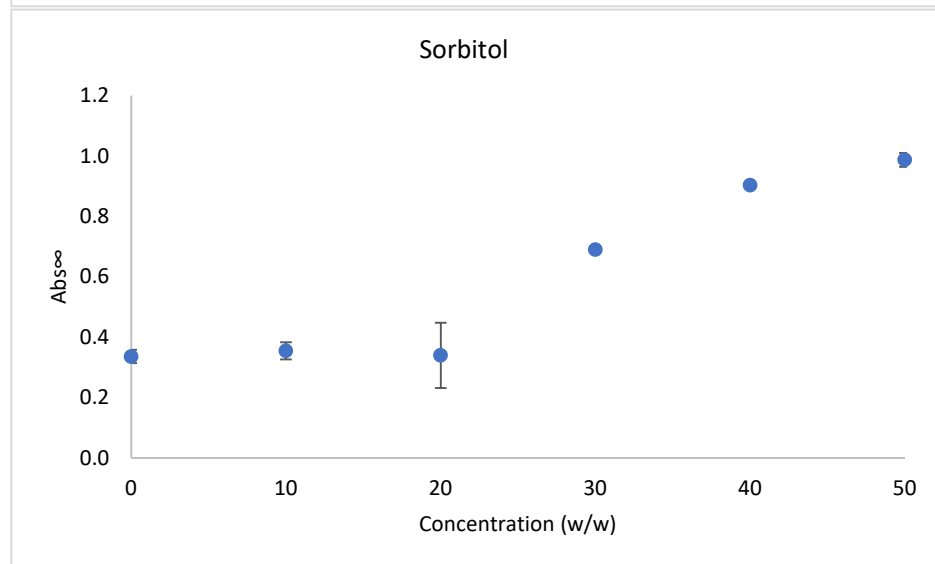

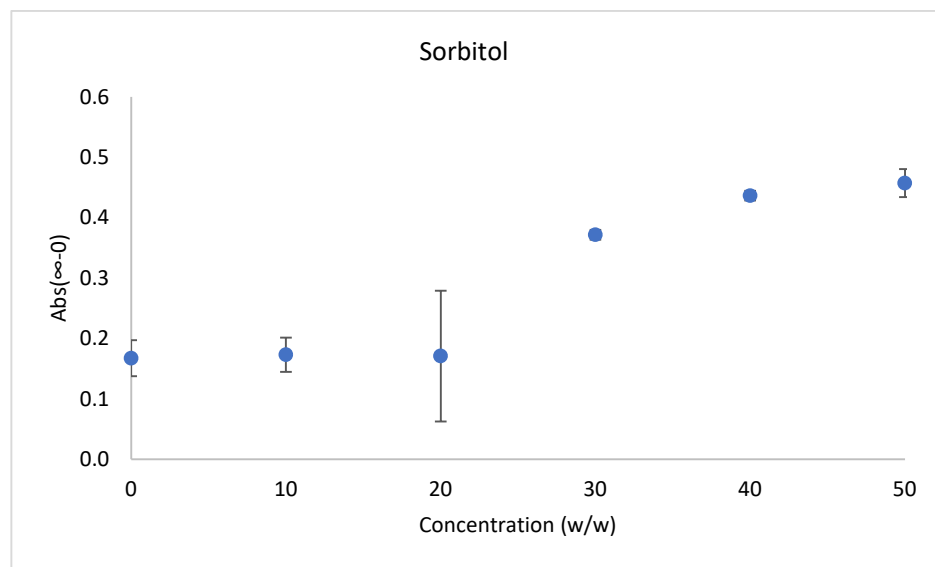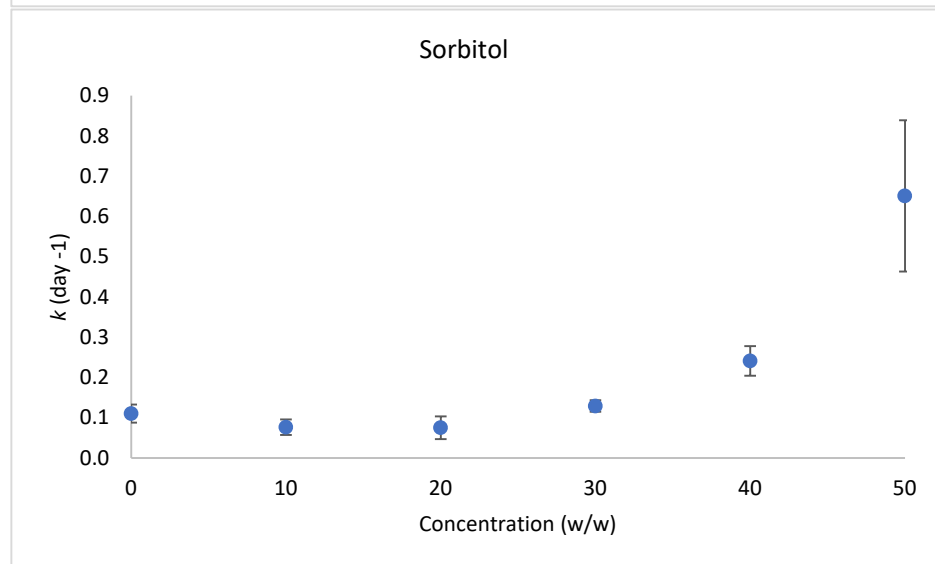

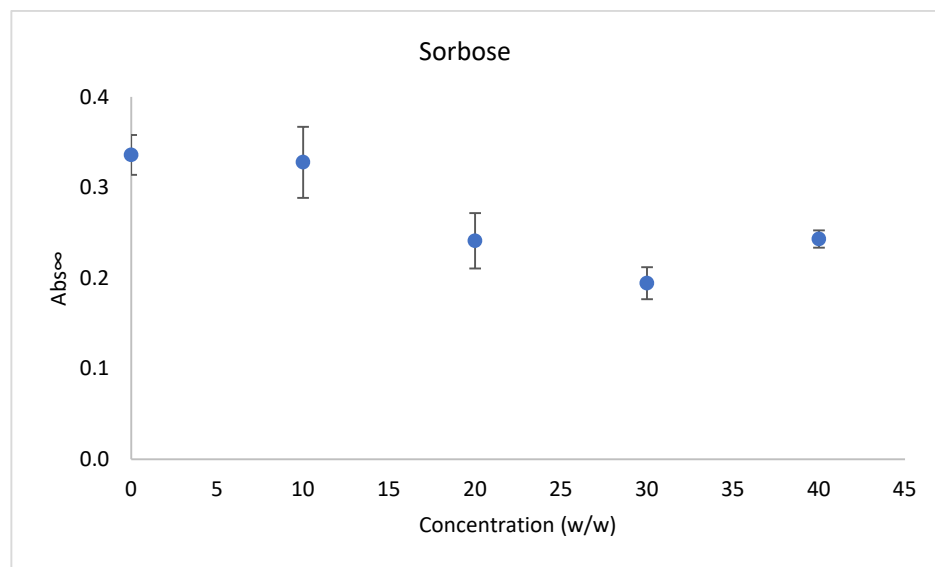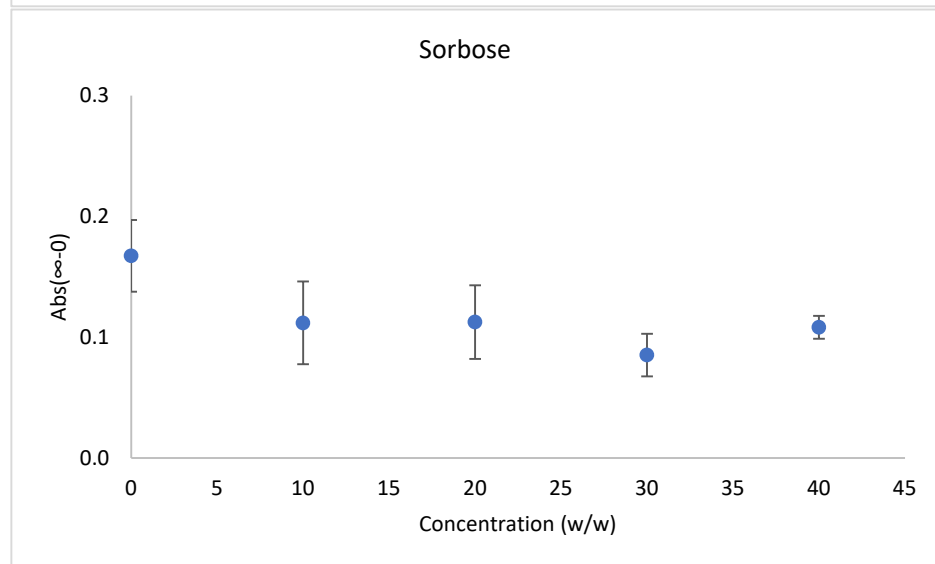

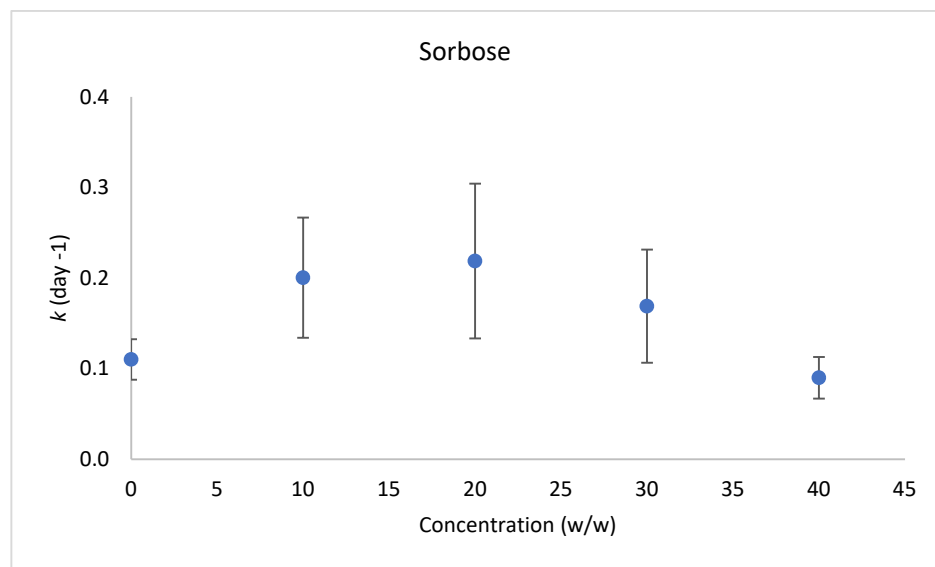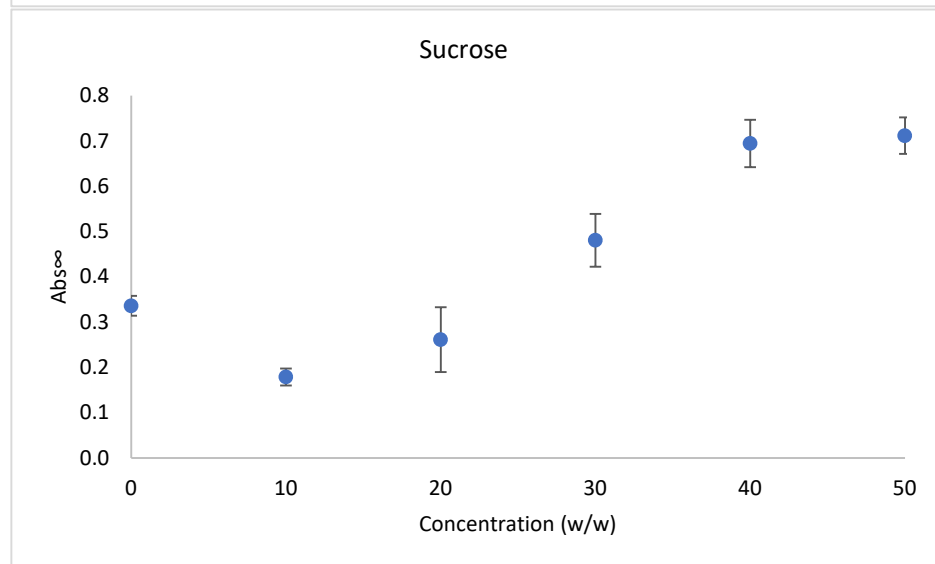

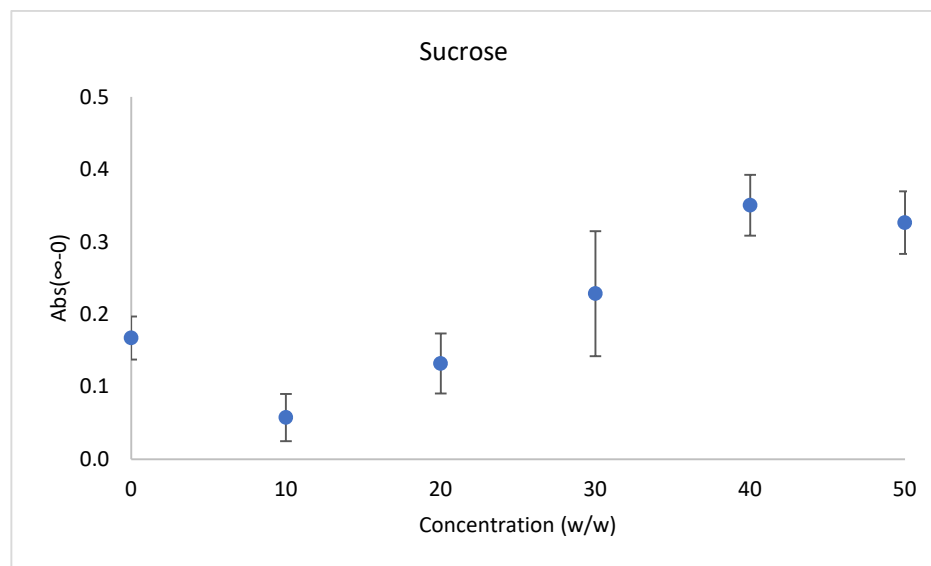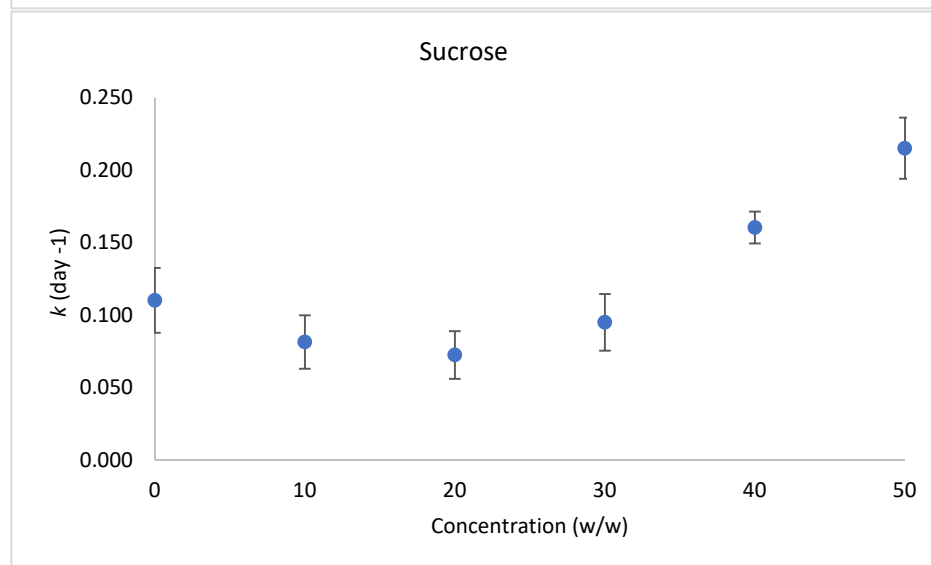

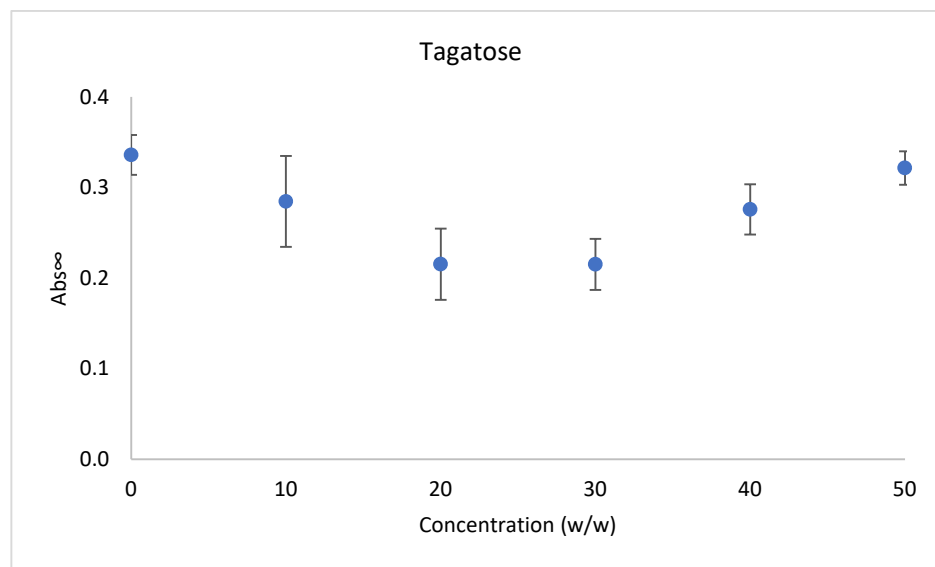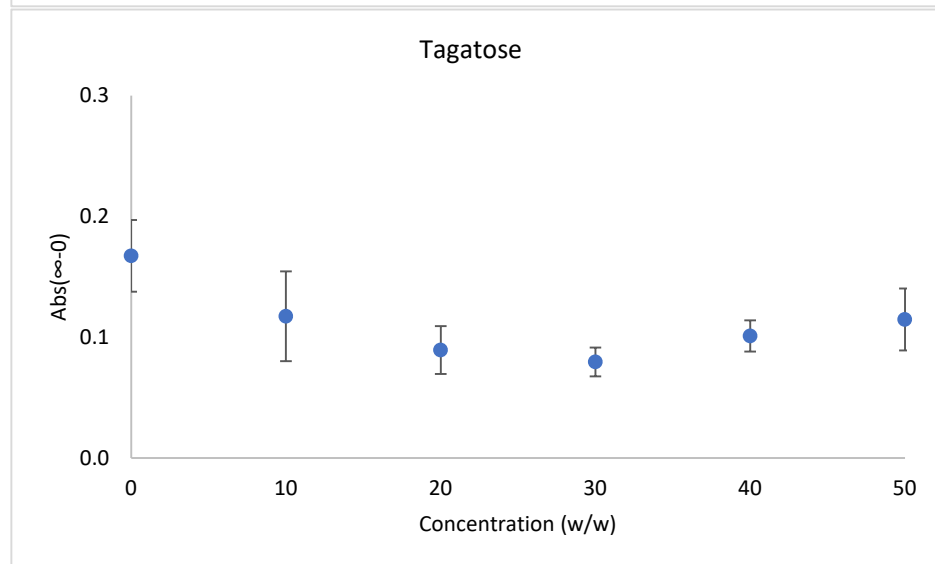

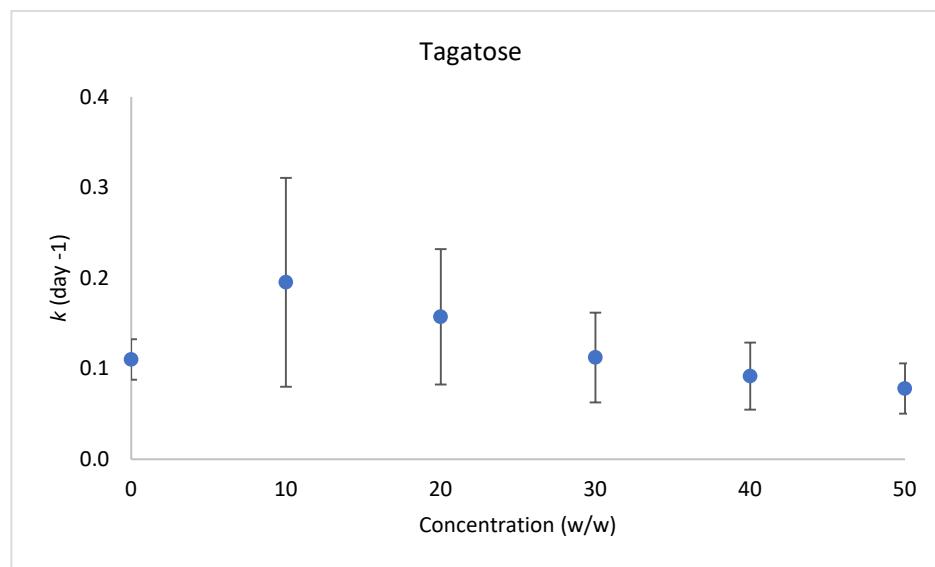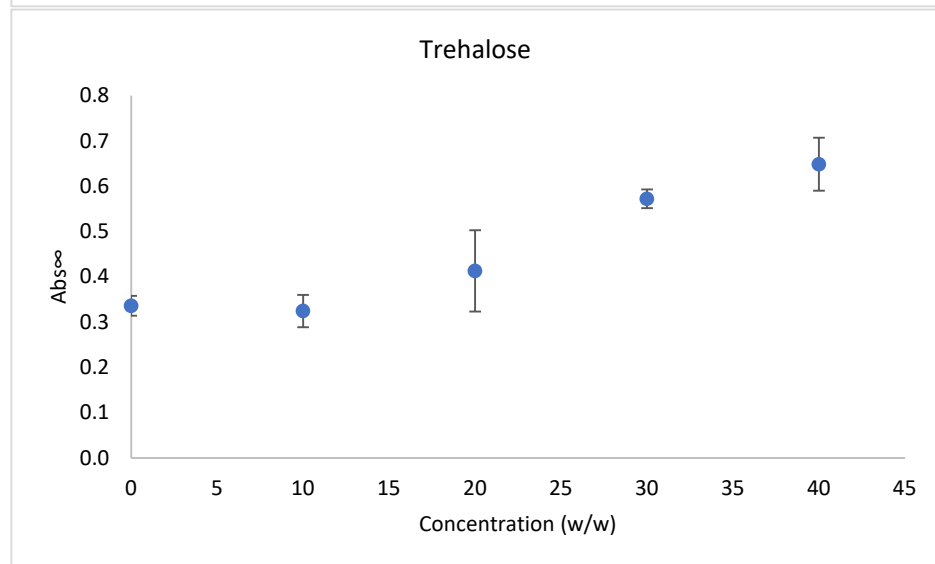



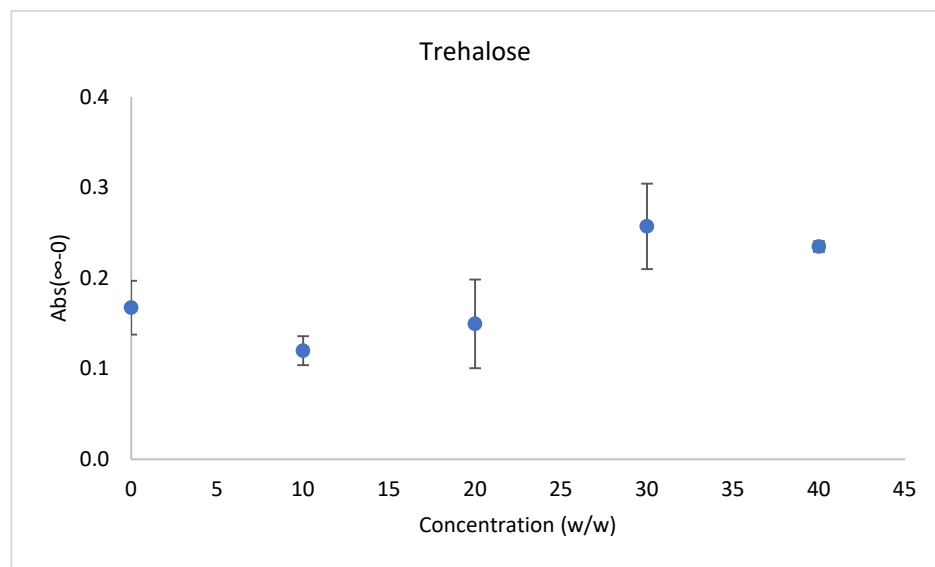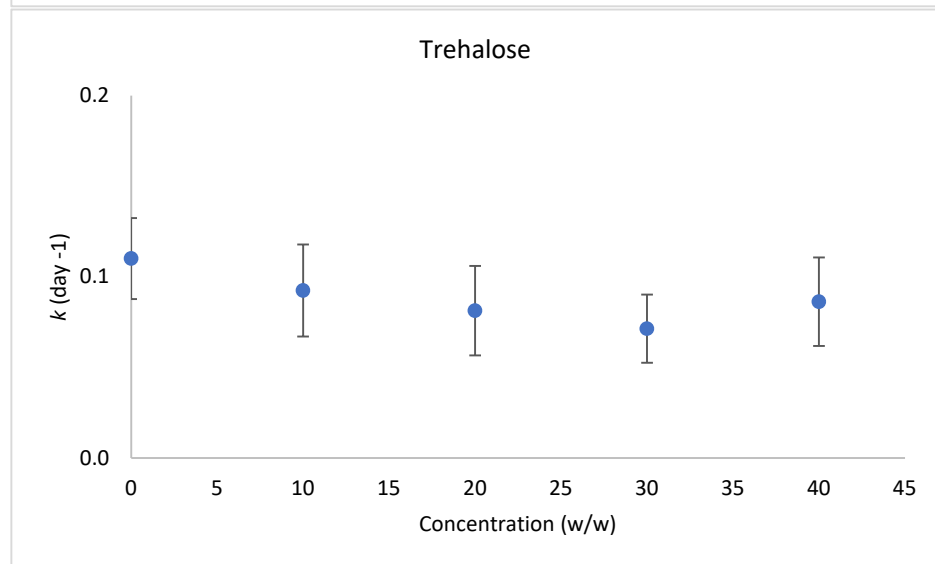

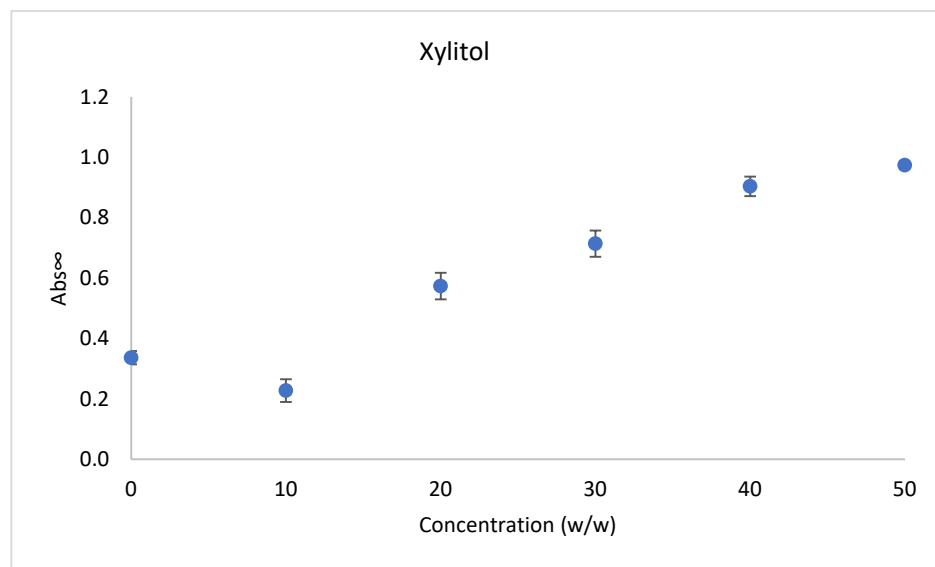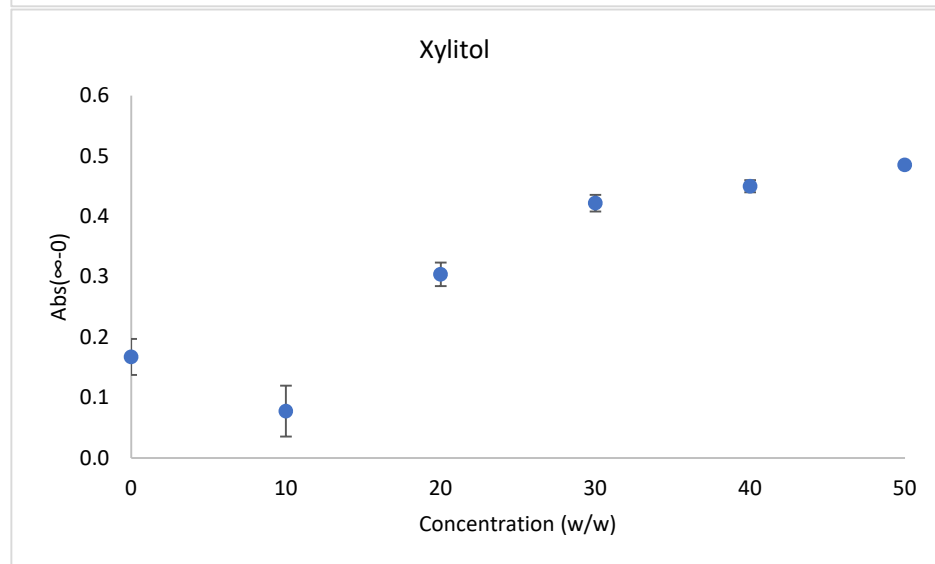

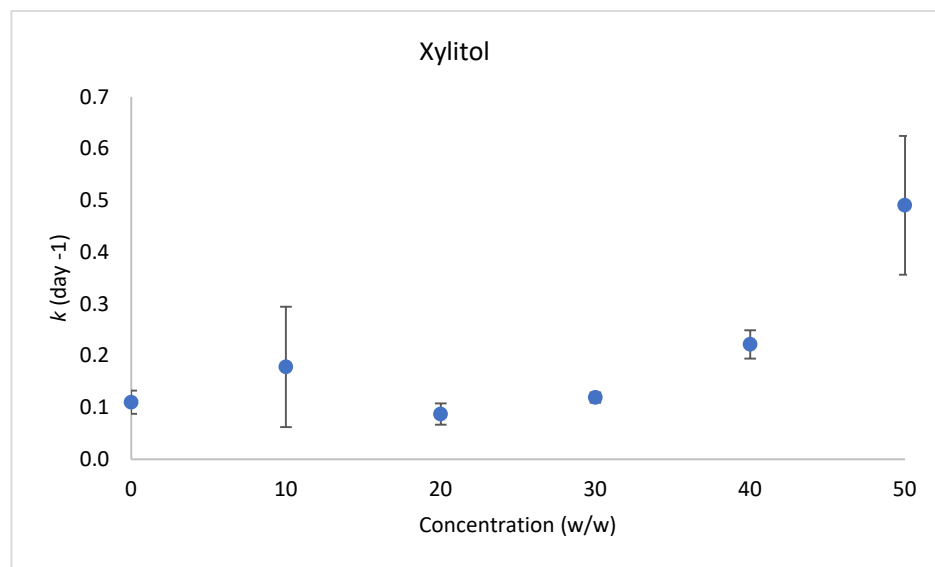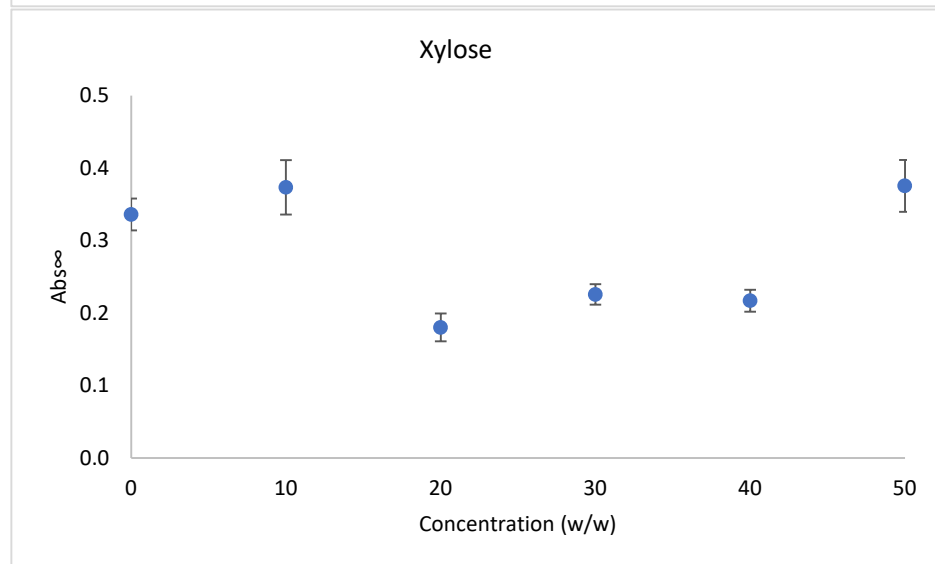

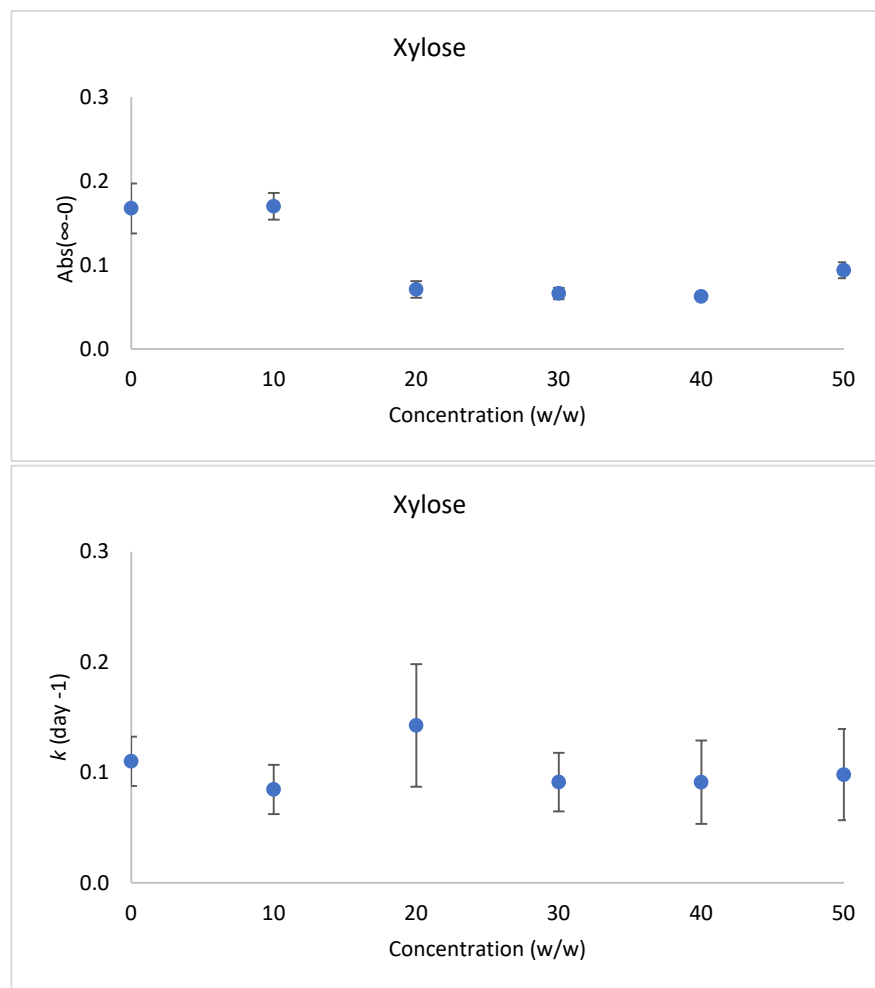

**Figure S1.** Plots of 620 nm absorbances after 28 days ( $Abs_{\infty}$ ) with one standard deviation, changes of 620 nm absorbances from day 0 to day 28 ( $Abs_{(\infty-0)}$ ) with one standard deviation, and the calculated Avrami rate constants ( $k$ ) with 95% confidence intervals that were grouped by sweetener concentrations within sweeteners.

## References

1. Goldberg, R.N.; Tewari, Y.B. Thermodynamic and transport properties of carbohydrates and their monophosphates: The pentoses and hexoses. *J. Phys. Chem. Ref. Data* **1989**, *18*, 809–880. <https://doi.org/10.1063/1.555831>.
2. Angyal, S.; Bethell, G. Conformational analysis in carbohydrate chemistry. III. The  $^{13}\text{C}$  NMR spectra of the hexuloses. *Aust. J. Chem.* **1976**, *29*, 1249–1265. <https://doi.org/10.1071/CH9761249>.
3. Bell, A.F.; Hecht, L.; Barron, L.D. Disaccharide solution stereochemistry from vibrational Raman optical activity. *J. Am. Chem. Soc.* **1994**, *116*, 5155–5161. <https://doi.org/10.1021/ja00091a019>.
4. Lichtenthaler, F.W.; Rönninger, S.  $\alpha$ -D-Glucopyranosyl-D-fructoses: Distribution of furanoid and pyranoid tautomers in water, dimethyl sulphoxide, and pyridine. Studies on ketoses. Part 4. *J. Chem. Soc. Perkin Trans. 2* **1990**, *8*, 1489–1497. <https://doi.org/10.1039/P29900001489>.
5. Fox, P.F.; Uniacke-Lowe, T.; McSweeney, P.L.H.; O'Mahony, J.A. Lactose. In *Dairy Chemistry and Biochemistry*, 2nd ed.; Springer: Berlin/Heidelberg, Germany, 2015; pp. 21–68.
6. Uedaira, H.; Ikura, M.; Uedaira, H. Natural-abundance oxygen-17 magnetic relaxation in aqueous solutions of carbohydrates. *Bull. Chem. Soc. Jpn.* **1989**, *62*, 1–4. <https://doi.org/10.1246/bcsj.62.1>.
7. Kajiwar, K.; Franks, F.; Echlin, P.; Greer, A.L. Structural and dynamic properties of crystalline and amorphous phases in raffinose-water mixtures. *Pharm. Res.* **1999**, *16*, 1441–1448. <https://doi.org/10.1023/a:1018915512289>.
8. Kawai, H.; Sakurai, M.; Inoue, Y.; Chûjô, R.; Kobayashi, S. Hydration of oligosaccharides: Anomalous hydration ability of trehalose. *Cryobiology* **1992**, *29*, 599–606. [https://doi.org/10.1016/0011-2240\(92\)90064-9](https://doi.org/10.1016/0011-2240(92)90064-9).
9. Shamil, S.; Birch, G.; Mathlouthi, M.; Clifford, M. Apparent molar volumes and tastes of molecules with more than one sapo-692 phore. *Chem. Senses* **1987**, *12*, 397–409, doi:<https://doi.org/10.1093/chemse/12.2.397>.
